# Supplementary material
Source: MDPI journal article supplement (https://www.mdpi.com/1424-8247/15/8/1013)
Supplement: s1 [file s1]

# Certificate of analysis

Internal spec. no: SP.FV-

**Product:** Kan Jang Andrographis capsules

**Batch no:** 3400195

Batch no. bulk: .....

Extr. Andrographis: .....

Pack. type: .....

Extr. Eleutherococcus: .....

Country: .....

| Parameter of analysis on packed | Method                    | Reference                                    | Result                    |     |
|---------------------------------|---------------------------|----------------------------------------------|---------------------------|-----|
|                                 |                           |                                              | Start                     | End |
| Appearance                      | Ocular                    | Transparent capsule with green/beige filling | Ej transparent vit kapsel |     |
| Loss on drying                  | Ph. Eur. Curr. Ed. 2.8.17 | $\leq 7\%$                                   | 4%                        |     |
| Diameter                        | Caliper                   | 7.6 mm $\pm$ 0.2 mm                          | 7,5 mm                    |     |
| Length                          | Caliper                   | 21.7 mm $\pm$ 0.3 mm                         | 21,4 mm                   |     |
| Uniformity of mass              | Ph. Eur. Curr. Ed. 2.9.5  | Average = 555 mg $\pm$ 7.5%                  | 525 mg                    |     |
| Uniformity of mass deviations   | Ph. Eur. Curr. Ed. 2.9.5  | $n \leq 2$ deviates 7.5-15%                  | 2st                       |     |
|                                 |                           | $n = 0$ deviates $>15\%$                     |                           |     |
| Disintegration                  | Ph. Eur. Curr. Ed. 2.9.1  | $\leq 30$ min                                | 45 min                    |     |
| <b>External</b>                 |                           |                                              |                           |     |
| Microbial contamination         | Ph. Eur. Curr. Ed. 5.1.8  | Ph. Eur. Cat B                               |                           |     |

| Parameter of analysis on bulk        | Method              | Reference                         | Result          |
|--------------------------------------|---------------------|-----------------------------------|-----------------|
| Identity                             | SM-010              | = ref                             | = Ref           |
| Assay: UPLC - Andrographolide        | SM-125              | -                                 | 13,8 mg/capsule |
| UPLC - 14-Deoxy-11,12-didehydroandr. | SM-125              | -                                 | 1,8 mg/capsule  |
| $\Sigma$ Andrographolides            | SM-125              | 12 - 18 mg/capsule                | 16 mg/capsule   |
| UPLC - Neoandrographolide            | SM-125              | n.a.                              | 3,9 mg/capsule  |
| Assay: HPLC - Eleutheroside B        | SM-066              | -                                 | 0,12 mg/capsule |
| HPLC - Eleutheroside E               | SM-066              | -                                 | 0,13 mg/capsule |
| $\Sigma$ Eleutheroside B and E       | SM-066              | 0.15-0.51 mg/capsule              | 0,25 mg/capsule |
| <b>Amount of native extract</b>      |                     |                                   |                 |
| Eleutherococcus                      | SM-136              | 37.5 mg/capsule $\pm 10\%$        |                 |
| Andrographis                         | SM-136              | 375 mg/capsule $\pm 10\%$         |                 |
| <b>External</b>                      |                     |                                   |                 |
| Pyrrolizidine alkaloids              | SOP 805521 Phytolab | $\leq 0.25 \mu\text{g/capsule}^*$ |                 |

\*With daily dose of 4 capsules

**Date of analysis:** .....

**Date of release:** .....

**Analyst, sign:** ...../.....

**QP-responsible:** .....

**Comments:**

**Manufacturing date:**

**Expiry date (three years):**

# Kan Jang Capsule

## HPTLC

### 3400195

Method: SM-010

VIS

Ref Test Ref  
Neo-Andr 3400195 30280

254nm

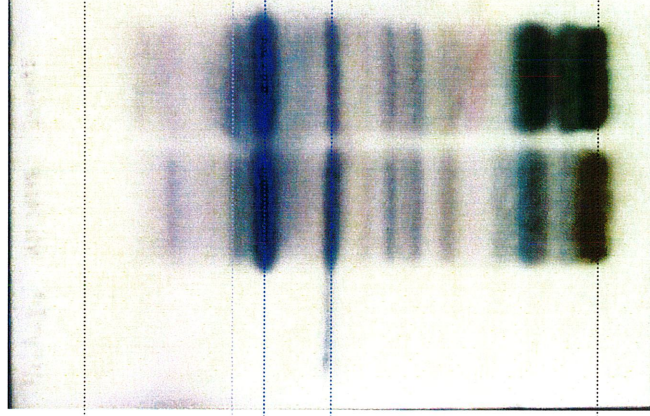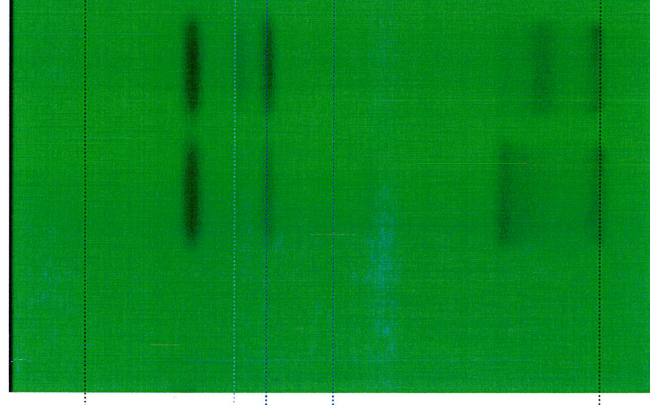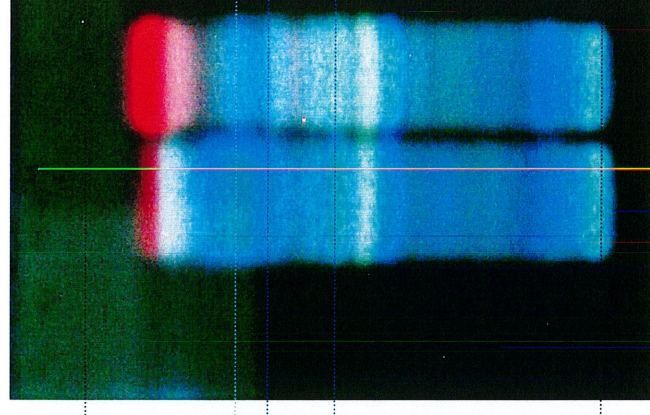

Front

Start

Absorbent: Silica gel 60 F<sub>254</sub> precoated HPTLC plates  
Solvent system: Ethylacetate : methanol : water (38 : 7 : 4)  
Spray reagents: vanillin-sulphuric acid solution

Sign: 

Date: 2021-05-06



**Mikrolab Stockholm AB**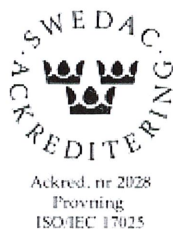**Rapport**

Utfärdat av ackrediterat laboratorium

**Svenska Örtmedicinska Ins AB**

Susanna Panosyan  
Kövlingevägen 21  
312 50 Vallberga

Datum  
2021-04-28

Kundnummer      Provnummer  
20031              **K2102825-00**

**PROVUPPGIFTER**

Produkt: Kanjang  
Artikelnummer: N/A  
Batchnummer: 3400195  
Undersökningstyp: Totalantal odling/fasta produkter  
Ankomstdatum: 2021-04-23  
Testdatum: 2021-04-23  
Testad mängd: 45g  
Analyskrav enligt: Se metod  
Provtagare: Håkan Lejon

Capsule.

| ANALYSRESULTAT     | Metod | Resultat   | Enhet |
|--------------------|-------|------------|-------|
| Aeroba bakterier   | M0002 | <10        | CFU/g |
| Mögelsvampar       | M0002 | <10        | CFU/g |
| Jästsvampar        | M0002 | <10        | CFU/g |
| Escherichia coli   | M0017 | Ej påvisad | /1g   |
| G-neg. bakterier   | M0016 | <10        | CFU/g |
| Salmonella species | M0018 | Ej påvisad | /25 g |

**UTLÅTANDE OCH UPPLYSNINGAR**

TAMC: <10 CFU/g  
TYMC: <10 CFU/g  
Analys enligt gällande EP 2.6.12/2.6.13 och USP <61>/<62>

Sollentuna  
Datum: 2021-04-28

Susanna Nilsson  
Analysansvarig

\* Efter metodbeteckning, anger att metoden ej är ackrediterad.

  
Linda Storbjörk  
Laboratorieansvarig

Resultaten avser endast testade produkter.

Upplysningar om mätosäkerhet för kvantitativa mikrobiologiska analyser lämnas på begäran.

Adress:  
Mikrolab Stockholm AB  
Kung Hans Väg 3  
192 68 Sollentuna

Telefon  
08-297900  
E-post: sollentuna.lab@alsglobal.com

Styrelsens säte:  
Sollentuna  
Organisationsnummer  
556794-2171

**SampleName Kan Jang Andro****Rapport tablett**

Current Date 2021-05-06  
 Processing Method  
 Start Date 2021-05-05 16:13:06  
 System Name H\_CLASS  
 Run Time 35.00 Minutes

**Eleutherosid B**  
**Eleutherosid E**

Batch\_No 3400195

Software Empower 3 Software Build 3471  
 Channel PDA\_210.0nm, PDA\_220.0nm  
 Tablet\_Weight  
 Column no.: 427571

**Name: Eleutherosid B**

|           | SampleName     | Batch_No | Injection Volume (ul) | SampleWeight | RT    | Area   | Height | Name           | Procent_Amount |
|-----------|----------------|----------|-----------------------|--------------|-------|--------|--------|----------------|----------------|
| 1         | Kan Jang Andro | 3400195  | 10.00                 | 30.18800     | 5.368 | 397829 | 32101  | Eleutherosid B | 0.0223         |
| 2         | Kan Jang Andro | 3400195  | 10.00                 | 30.18800     | 5.485 | 374764 | 27891  | Eleutherosid B | 0.0210         |
| 3         | Kan Jang Andro | 3400195  | 10.00                 | 30.18800     | 5.499 | 412101 | 32830  | Eleutherosid B | 0.0231         |
| Mean      |                |          |                       |              | 5.450 |        |        |                | 0.0221         |
| Std. Dev. |                |          |                       |              | 0.07  |        |        |                | 0.0010         |
| % RSD     |                |          |                       |              | 1.3   |        |        |                | 4.75           |

**Name: Eleutherosid E**

|           | SampleName     | Batch_No | Injection Volume (ul) | SampleWeight | RT     | Area   | Height | Name           | Procent_Amount |
|-----------|----------------|----------|-----------------------|--------------|--------|--------|--------|----------------|----------------|
| 1         | Kan Jang Andro | 3400195  | 10.00                 | 30.18800     | 16.980 | 572241 | 39768  | Eleutherosid E | 0.0242         |
| 2         | Kan Jang Andro | 3400195  | 10.00                 | 30.18800     | 17.016 | 574688 | 40088  | Eleutherosid E | 0.0243         |
| 3         | Kan Jang Andro | 3400195  | 10.00                 | 30.18800     | 17.053 | 570466 | 39164  | Eleutherosid E | 0.0241         |
| Mean      |                |          |                       |              | 17.016 |        |        |                | 0.0242         |
| Std. Dev. |                |          |                       |              | 0.04   |        |        |                | 0.0001         |
| % RSD     |                |          |                       |              | 0.2    |        |        |                | 0.37           |

| <u>Results</u>         | <u>mg/tablet</u> | <u>calculated</u> | <u>% found</u> |
|------------------------|------------------|-------------------|----------------|
| <u>Eleutherosid B:</u> | 0,12 mg/capsule  |                   |                |
| <u>Eleutherosid E:</u> | 0,13 mg/capsule  |                   |                |
| <u>Eleutherosides:</u> | 0,25 mg/capsule  |                   |                |

Sig.: 



## Chromatogram

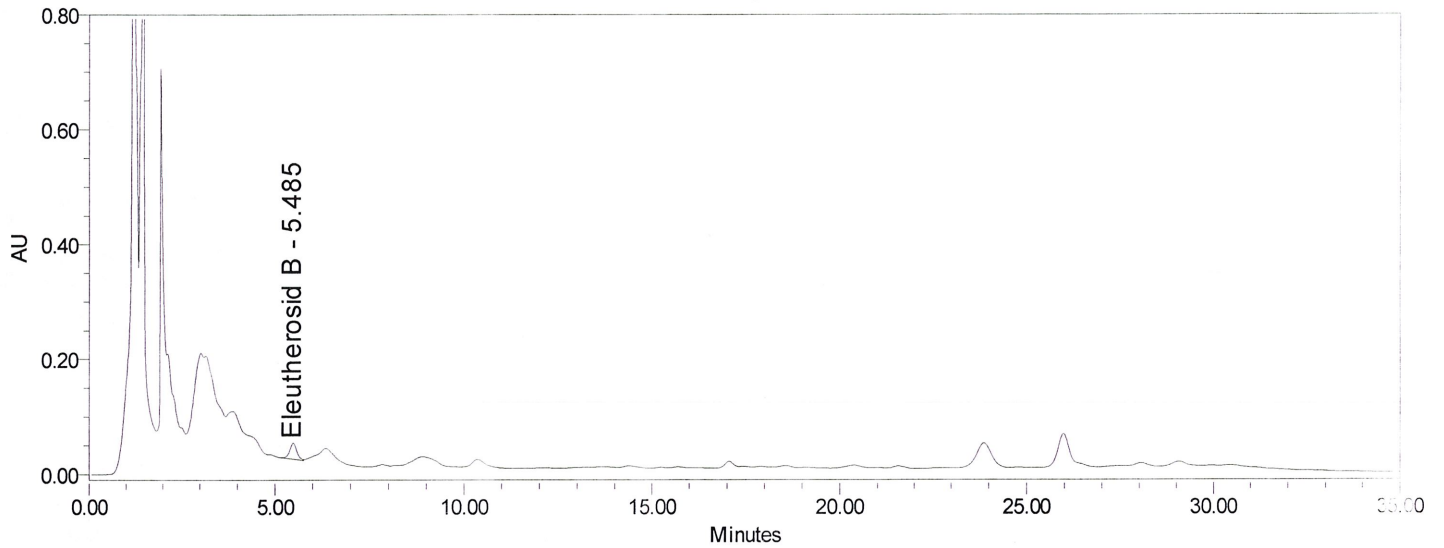

SampleName Kan Jang Andro; Batch\_No 3400195; Vial 1:A,3; Date Acquired 2021-05-05 22:51:35  
CEST; Channel Name PDA\_220.0nm

## Chromatogram

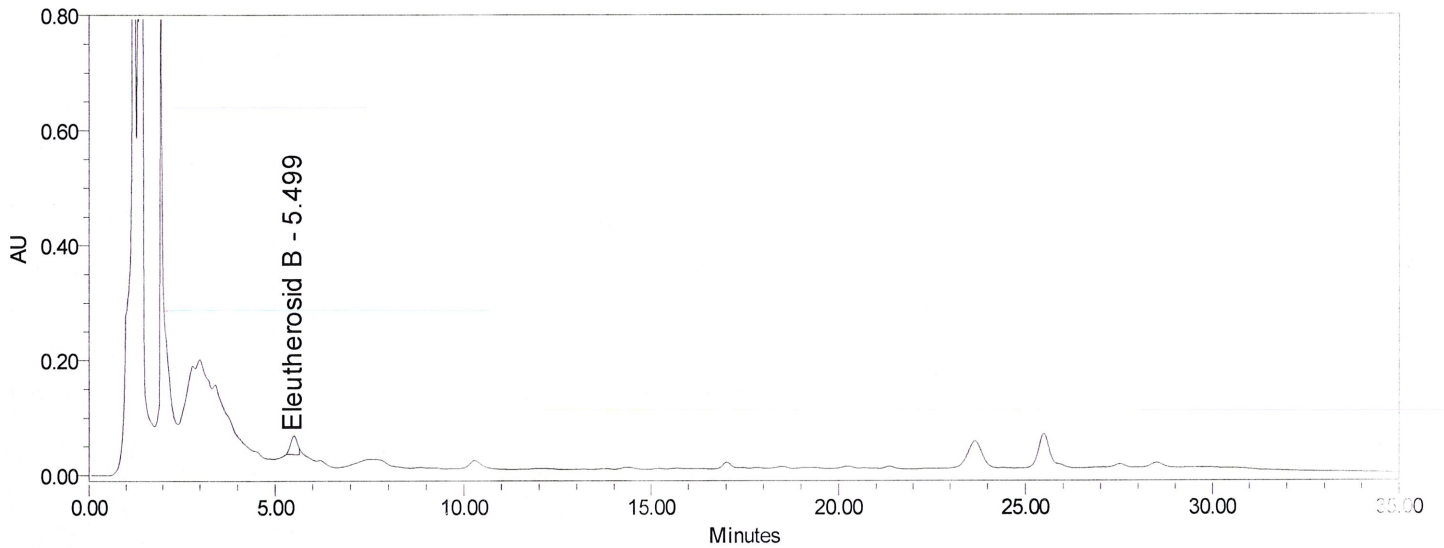

SampleName Kan Jang Andro; Batch\_No 3400195; Vial 1:A,3; Date Acquired 2021-05-05 23:52:43  
CEST; Channel Name PDA\_220.0nm

Sig.: 

**Chromatogram**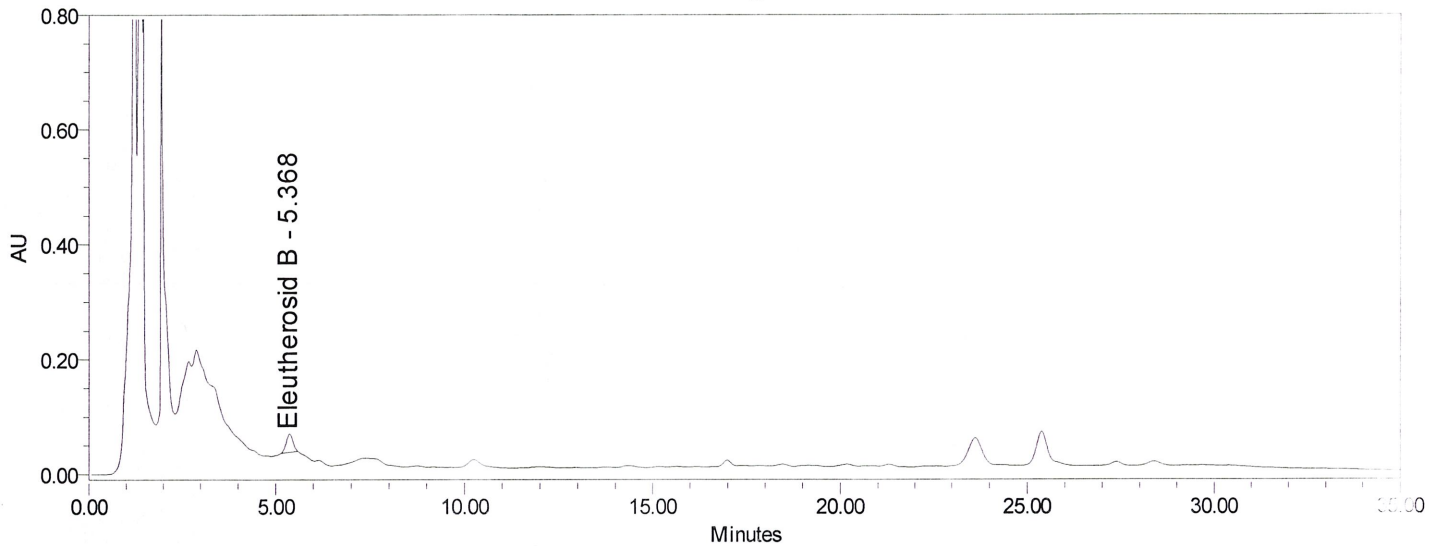

SampleName Kan Jang Andro; Batch\_No 3400195; Vial 1:A,3; Date Acquired 2021-05-06 00:53:53  
CEST; Channel Name PDA\_220.0nm

**Chromatogram**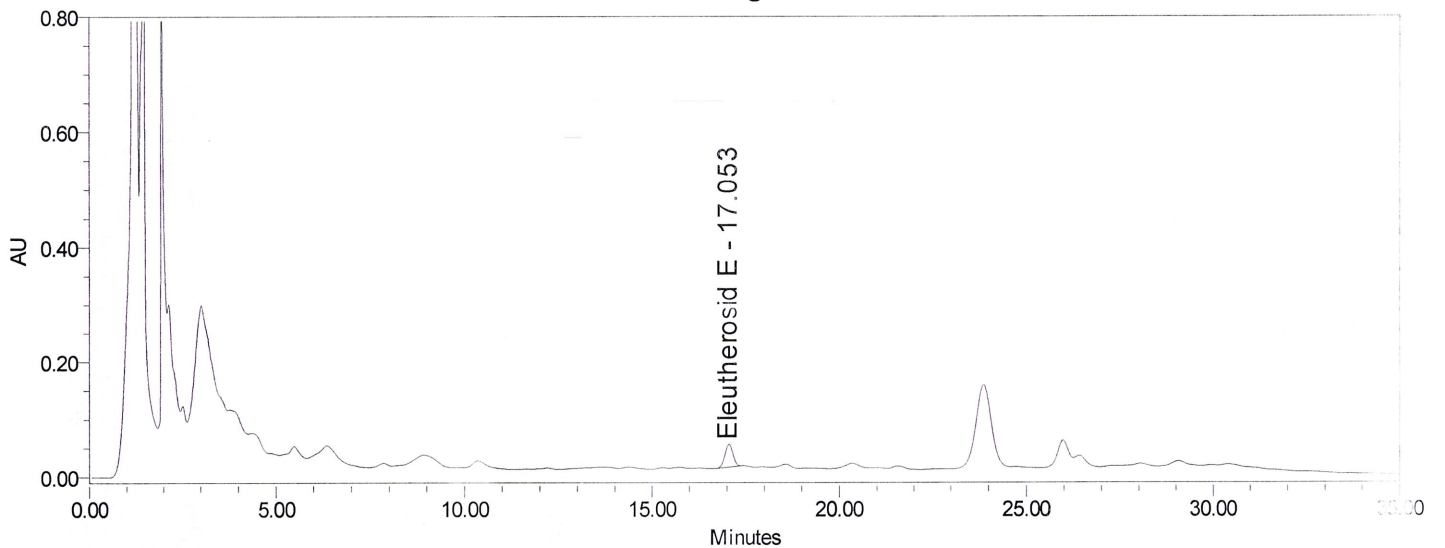

SampleName Kan Jang Andro; Batch\_No 3400195; Vial 1:A,3; Date Acquired 2021-05-05 22:51:35  
CEST; Channel Name PDA\_210.0nm

Sig.: 

**Chromatogram**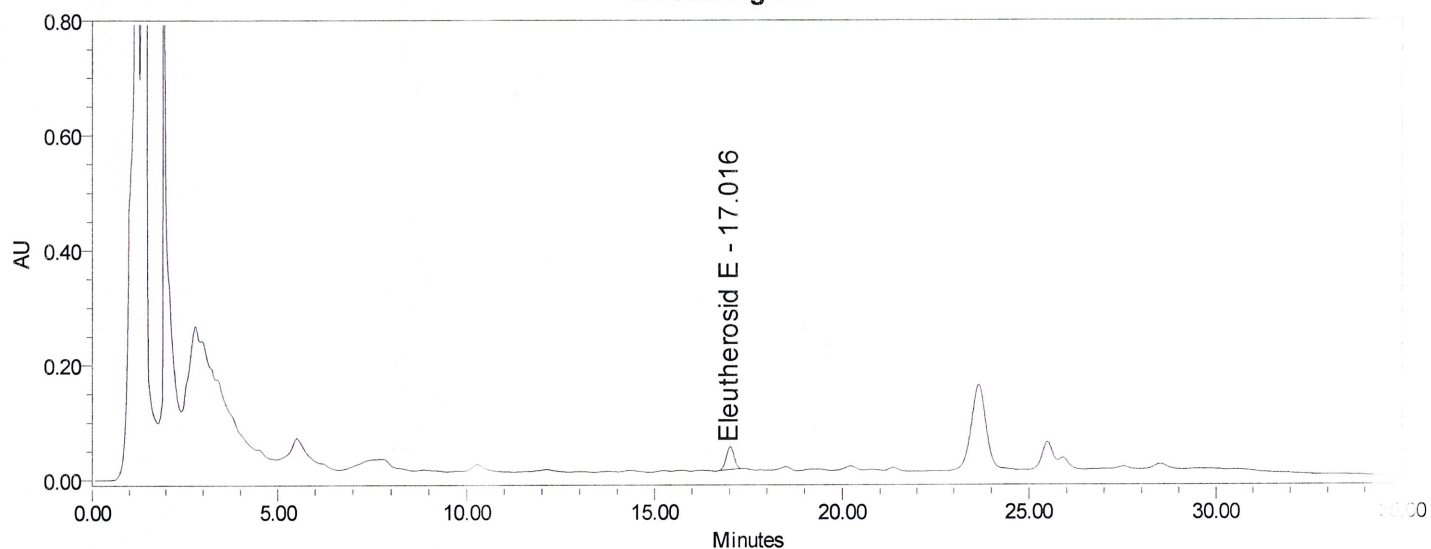

SampleName Kan Jang Andro; Batch\_No 3400195; Vial 1:A,3; Date Acquired 2021-05-05 23:52:43  
CEST; Channel Name PDA\_210.0nm

**Chromatogram**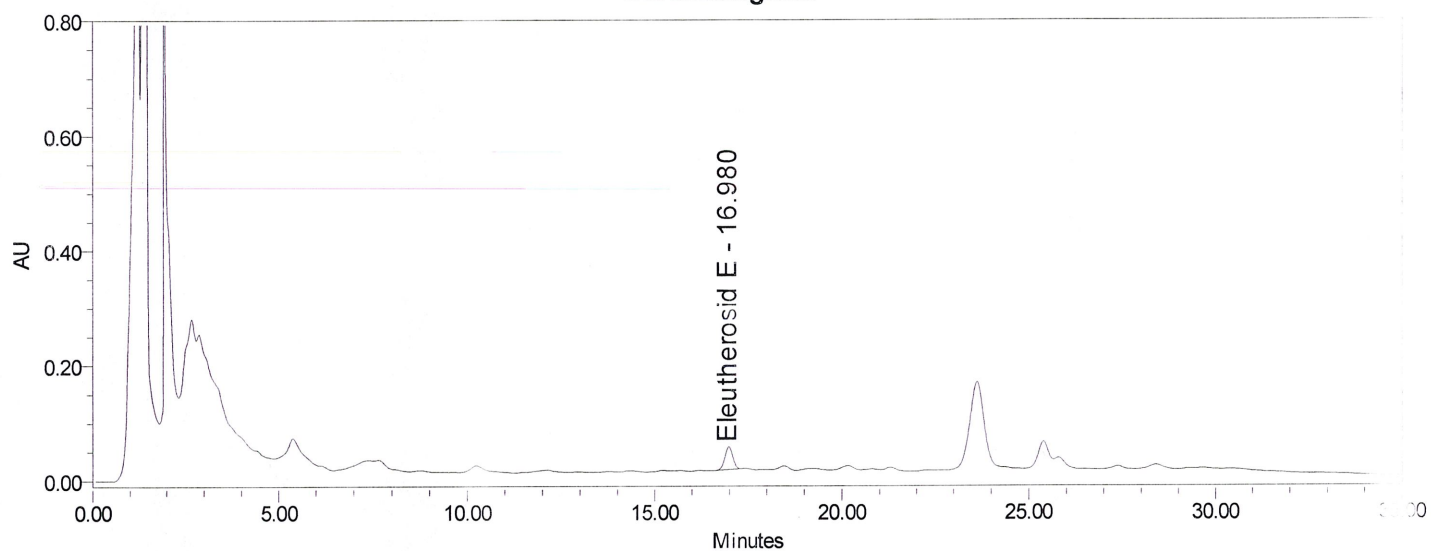

SampleName Kan Jang Andro; Batch\_No 3400195; Vial 1:A,3; Date Acquired 2021-05-06 00:53:53  
CEST; Channel Name PDA\_210.0nm

Sig.: 



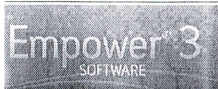**Second identification with PDA**

Current Date 2021-05-06

Software Empower 3 Software Build 3

System Name H\_CLASS

Processing Method Eleuth\_PDA

Run Time 35.00 Minutes

Start Date 2021-05-05 16:13:06

**Eleutherosid B,  
Eleutherosid E****SampleName Kan Jang Andro**

Batch\_No 3400195

**Spectrum Index Plot**

Eleutherosid E - 17.053

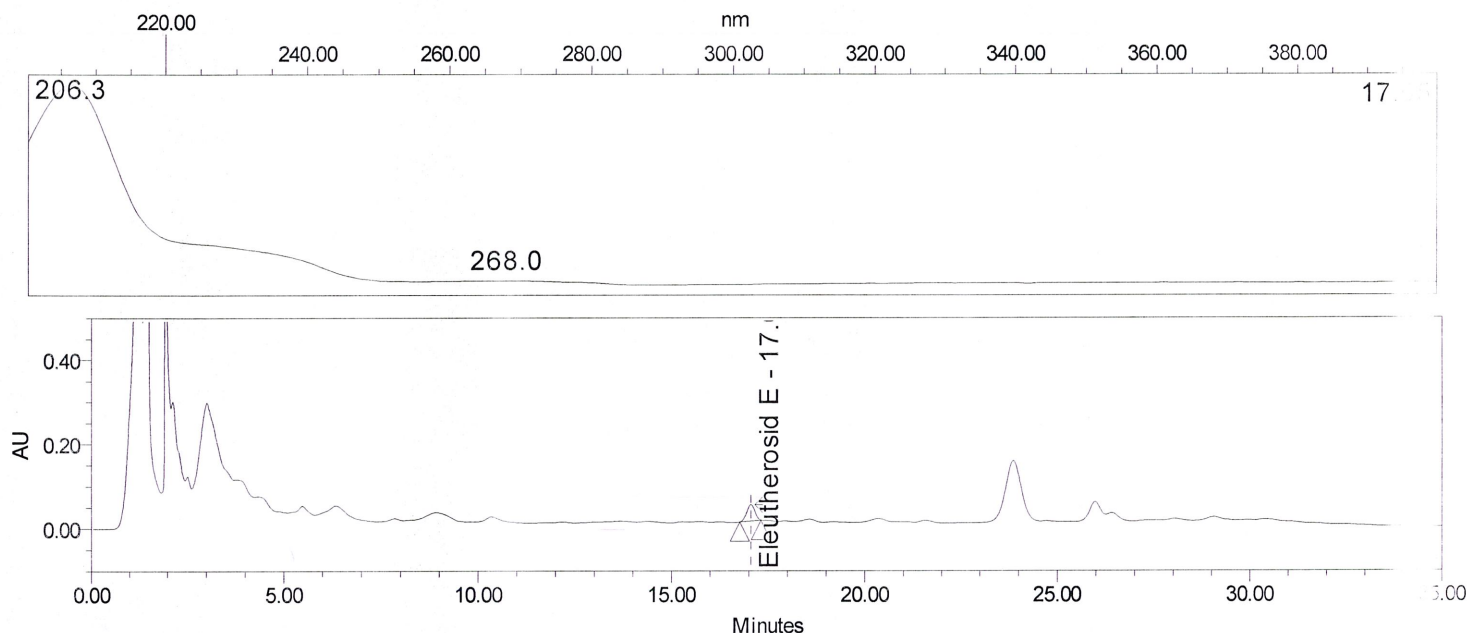**Spectrum Index Plot**

Eleutherosid B - 5.483

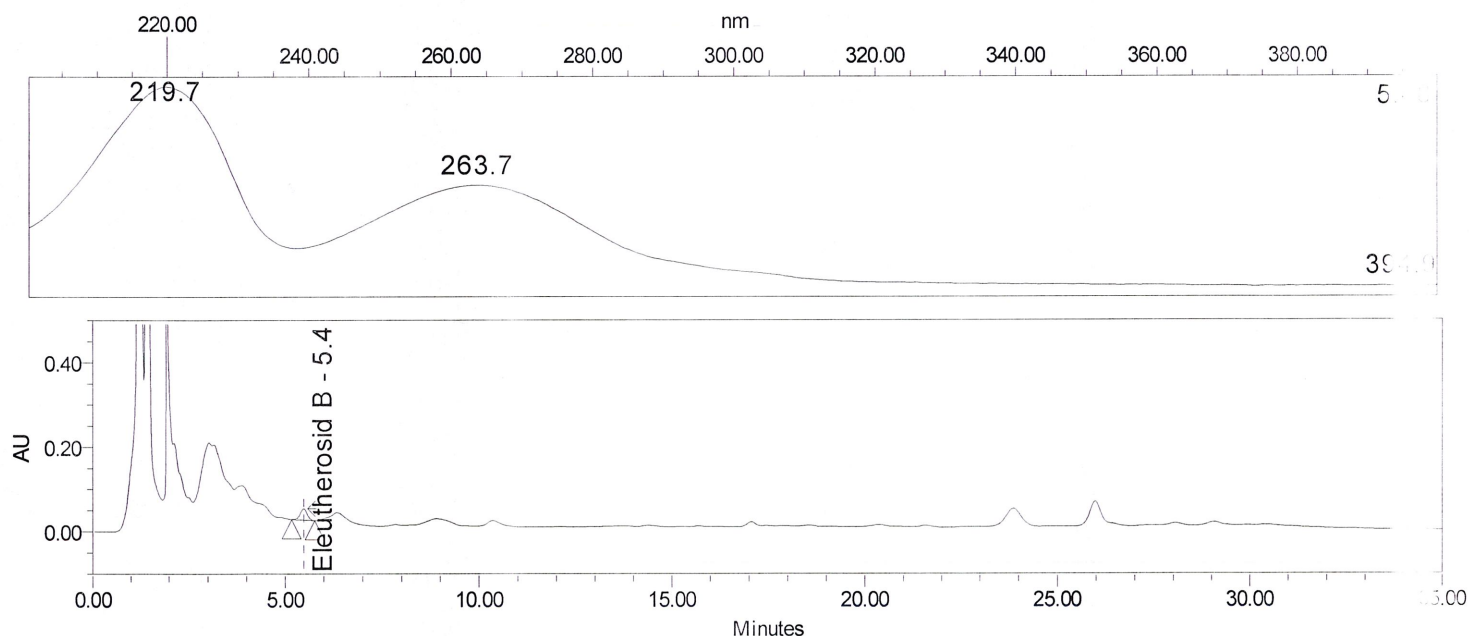

Sign: \_\_\_\_\_

## Match Plot

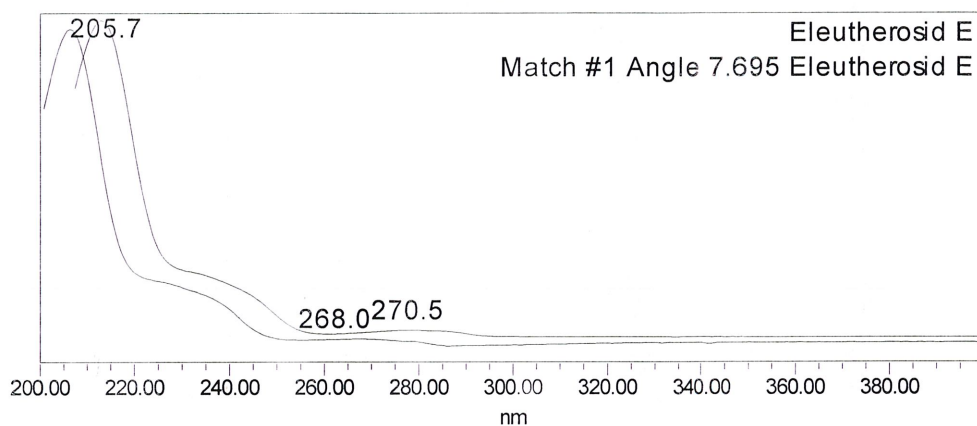

SampleName Kan Jang Andro Batch\_No 3400195 Vial 1:A,3 Injection 1 Date  
Acquired 2021-05-05 22:51:35 CEST Name Eleutherosid E Match1 Angle  
7.695 Match1 Threshold 90.000 Match1 Spect. Name Eleutherosid E

## Match Plot

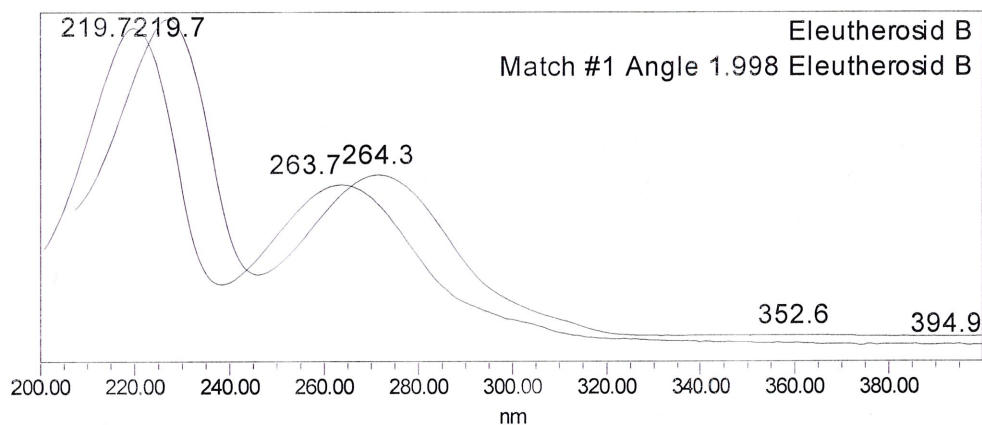

SampleName Kan Jang Andro Batch\_No 3400195 Vial 1:A,3 Injection 1 Date  
Acquired 2021-05-05 22:51:35 CEST Name Eleutherosid B Match1 Angle  
1.998 Match1 Threshold 52.885 Match1 Spect. Name Eleutherosid B

PDA Result Table

|   | Name           | RT     | Purity1<br>Angle | Purity1<br>Threshold | Match1<br>Spect. Name | Match1<br>Angle | Match1<br>Threshold |
|---|----------------|--------|------------------|----------------------|-----------------------|-----------------|---------------------|
| 1 | Eleutherosid B | 5.483  | 5.239            | 90.000               | Eleutherosid B        | 1.998           | 52.885              |
| 2 | Eleutherosid E | 17.053 | 6.078            | 90.000               | Eleutherosid E        | 7.695           | 90.000              |

Sign.: 

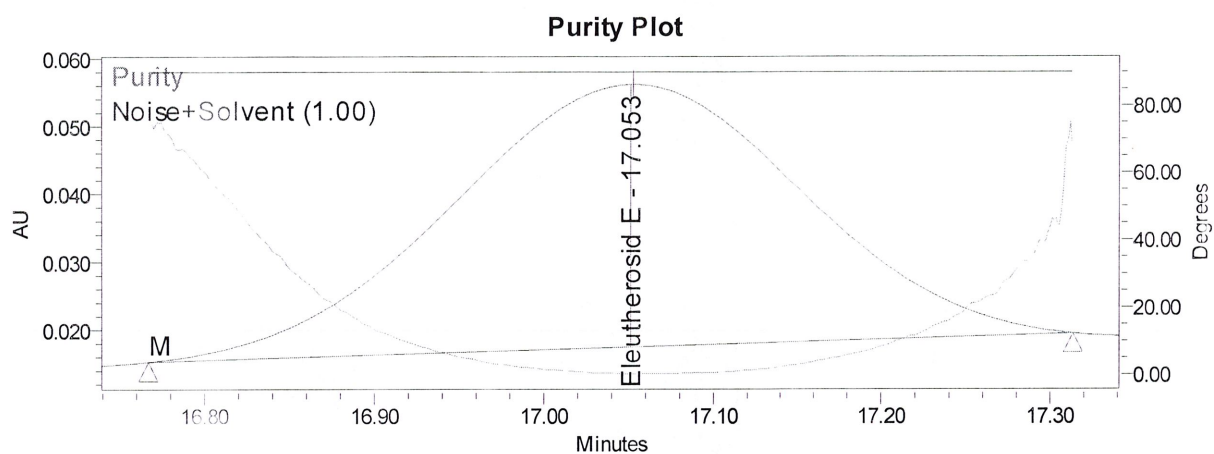

PA: 6.078 TH: 90.000

SampleName: Kan Jang Andro Batch\_No 3400195 Vial: 1:A,3 Injection: 1 Date

Acquired: 2021-05-05 22:51:35 CEST Purity1 Angle: 6.078 Purity1 Threshold: 90.000

Purity

Noise+Solvent (1.00)

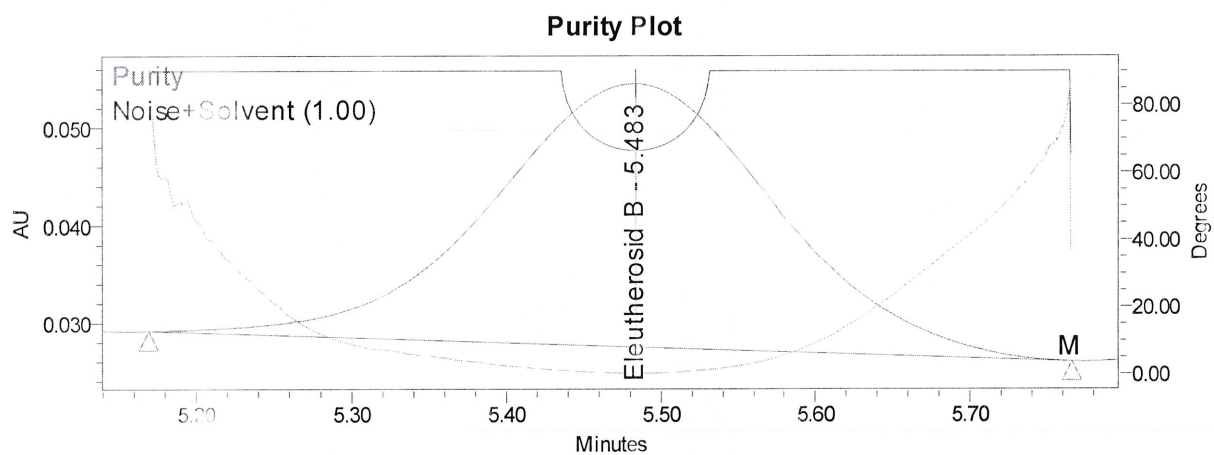

PA: 5.239 TH: 90.000

SampleName: Kan Jang Andro Batch\_No 3400195 Vial: 1:A,3 Injection: 1 Date

Acquired: 2021-05-05 22:51:35 CEST Purity1 Angle: 5.239 Purity1 Threshold: 90.000

Purity

Noise+Solvent (1.00)

Sign.: 



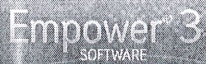**SampleName Kan Jang**

Current Date 2021-05-05

Software Empower 3 Software Build 347

Column no.: Acquity UPLC BEH C18 1.7µ  
01773000715504

Channel 205 nm, 254 nm, 223

Run Time 5.00 Minutes

Processing Method Andrographis

Start Date 2021-05-05 09:47:18 CEST

Tablet\_weight:

**Name Andrographolide,  
Neoandrographolide,  
Deoxy-didehydroandrographolide**

Batch\_No 3400195

**Component Results****Name: Andrographolide**

|           | SampleName | Batch_No | SampleWeight | RT    | Area   | Height | Name            | Percent_amount |
|-----------|------------|----------|--------------|-------|--------|--------|-----------------|----------------|
| 1         | Kan Jang   | 3400195  | 3.88400      | 2.077 | 686188 | 293954 | Andrographolide | 2,625          |
| 2         | Kan Jang   | 3400195  | 3.88400      | 2.079 | 686984 | 294074 | Andrographolide | 2,628          |
| 3         | Kan Jang   | 3400195  | 3.88400      | 2.081 | 688935 | 294607 | Andrographolide | 2,635          |
| Mean      |            |          |              | 2.1   |        |        |                 | 2,629          |
| Std. Dev. |            |          |              | 0.0   |        |        |                 |                |
| % RSD     |            |          |              | 0.1   |        |        |                 |                |

**Component Results****Name: Neoandrographolide**

|           | SampleName | Batch_No | SampleWeight | RT    | Area   | Height | Name               | Percent_amount |
|-----------|------------|----------|--------------|-------|--------|--------|--------------------|----------------|
| 1         | Kan Jang   | 3400195  | 3.88400      | 3.033 | 162998 | 128980 | Neoandrographolide | 0,738          |
| 2         | Kan Jang   | 3400195  | 3.88400      | 3.034 | 163340 | 129369 | Neoandrographolide | 0,740          |
| 3         | Kan Jang   | 3400195  | 3.88400      | 3.034 | 163731 | 129927 | Neoandrographolide | 0,742          |
| Mean      |            |          |              | 3.0   |        |        |                    | 0,740          |
| Std. Dev. |            |          |              | 0.0   |        |        |                    |                |
| % RSD     |            |          |              | 0.0   |        |        |                    |                |

**Component Results****Name: Deoxy-didehydroandrographolide**

|           | SampleName | Batch_No | SampleWeight | RT    | Area  | Height | Name                           | Percent_amount |
|-----------|------------|----------|--------------|-------|-------|--------|--------------------------------|----------------|
| 1         | Kan Jang   | 3400195  | 3.88400      | 3.315 | 71523 | 39793  | Deoxy-didehydroandrographolide | 0,342          |
| 2         | Kan Jang   | 3400195  | 3.88400      | 3.317 | 71383 | 39808  | Deoxy-didehydroandrographolide | 0,341          |
| 3         | Kan Jang   | 3400195  | 3.88400      | 3.317 | 71387 | 39914  | Deoxy-didehydroandrographolide | 0,341          |
| Mean      |            |          |              | 3.3   |       |        |                                | 0,342          |
| Std. Dev. |            |          |              | 0.0   |       |        |                                |                |
| % RSD     |            |          |              | 0.0   |       |        |                                |                |

| Results | mg/tbl | calculated | %found |
|---------|--------|------------|--------|
|---------|--------|------------|--------|

|                  |             |  |  |
|------------------|-------------|--|--|
| Andrographolide: | 13,8 mg/tbl |  |  |
|------------------|-------------|--|--|

|                                       |            |  |  |
|---------------------------------------|------------|--|--|
| Deoxy-11,12-didehydroandrographolide: | 1,8 mg/tbl |  |  |
|---------------------------------------|------------|--|--|

|                          |             |  |  |
|--------------------------|-------------|--|--|
| Total andr and DDD-andr: | 15,6 mg/tbl |  |  |
|--------------------------|-------------|--|--|

|                     |            |  |  |
|---------------------|------------|--|--|
| Neoandrographolide: | 3,9 mg/tbl |  |  |
|---------------------|------------|--|--|

Sign:

### Chromatogram

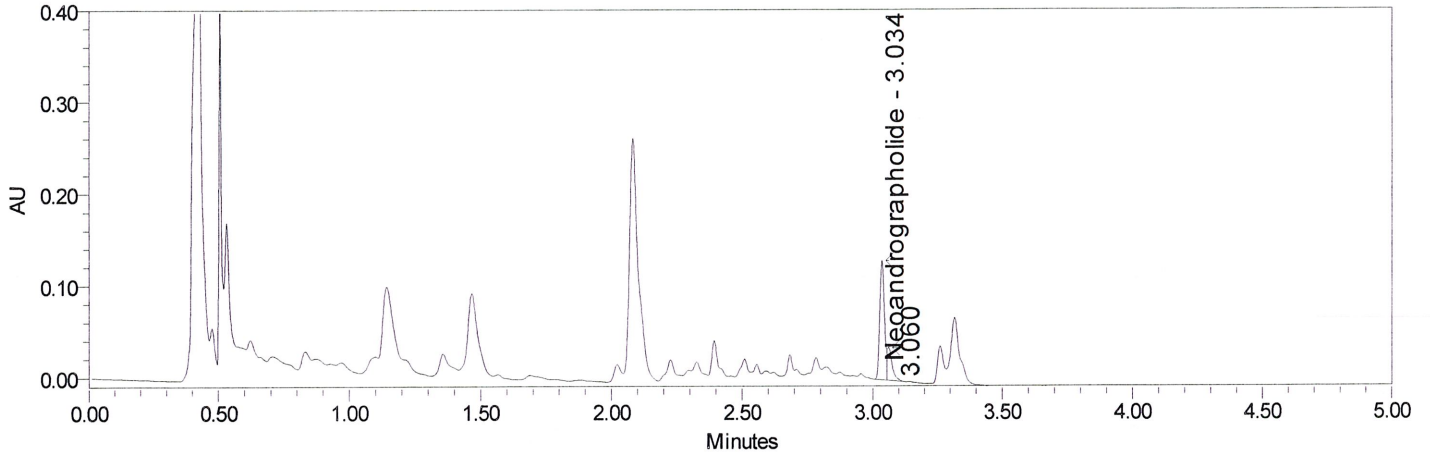

SampleName Kan Jang; Batch\_No 3400195; Vial 1:A,1; Injection 1; Date Acquired 2021-05-05 09:49:02 CEST; Channel Name 205 nm

### Chromatogram

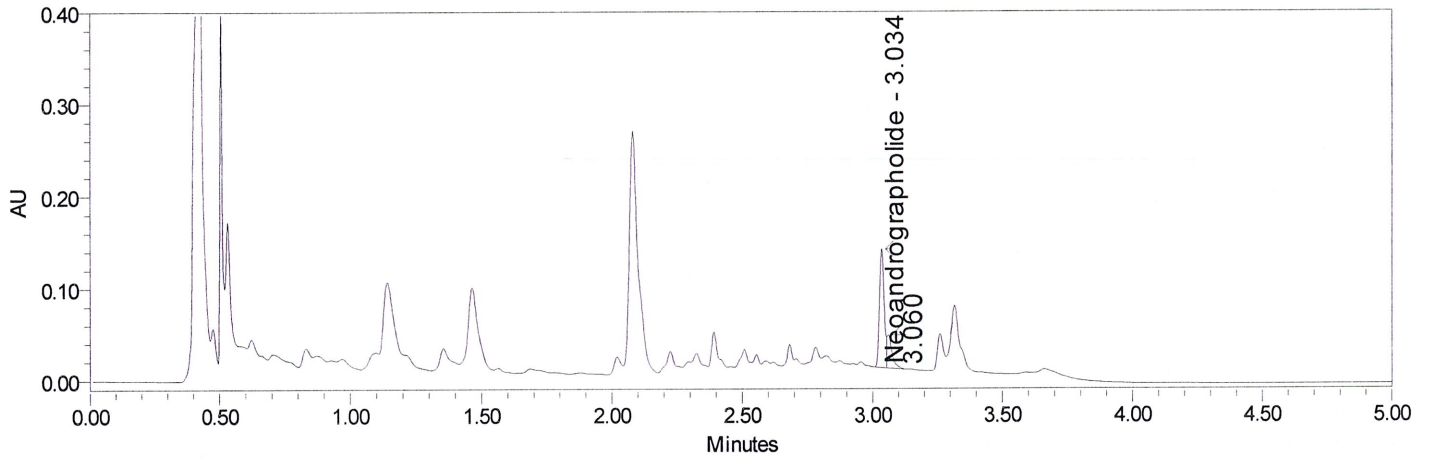

SampleName Kan Jang; Batch\_No 3400195; Vial 1:A,1; Injection 2; Date Acquired 2021-05-05 09:54:53 CEST; Channel Name 205 nm

### Chromatogram

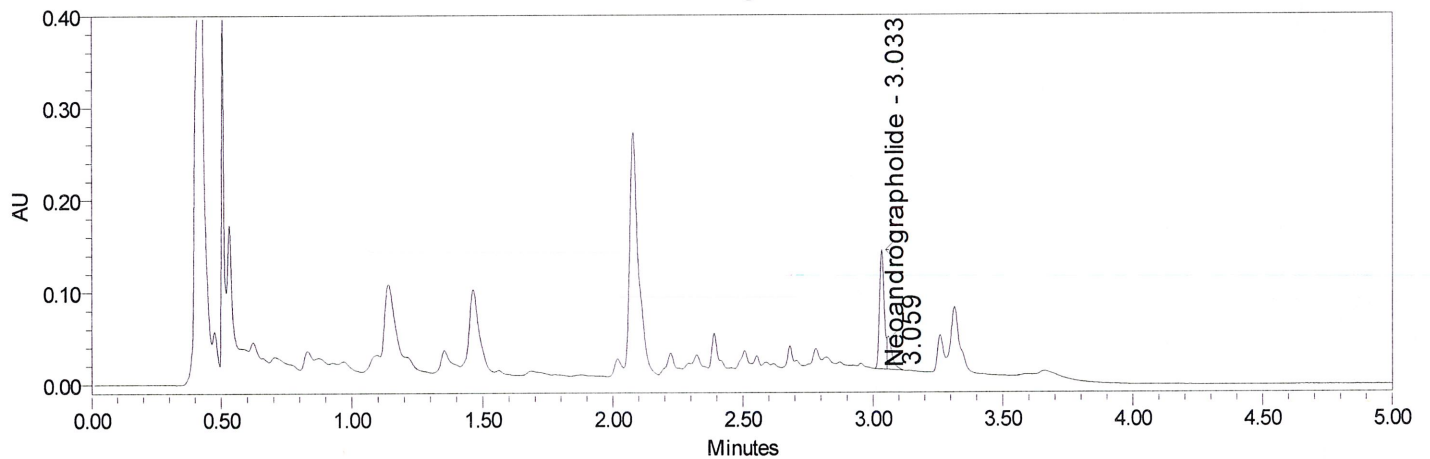

SampleName Kan Jang; Batch\_No 3400195; Vial 1:A,1; Injection 3; Date Acquired 2021-05-05 10:00:44 CEST; Channel Name 205 nm

Sign: 

### Chromatogram

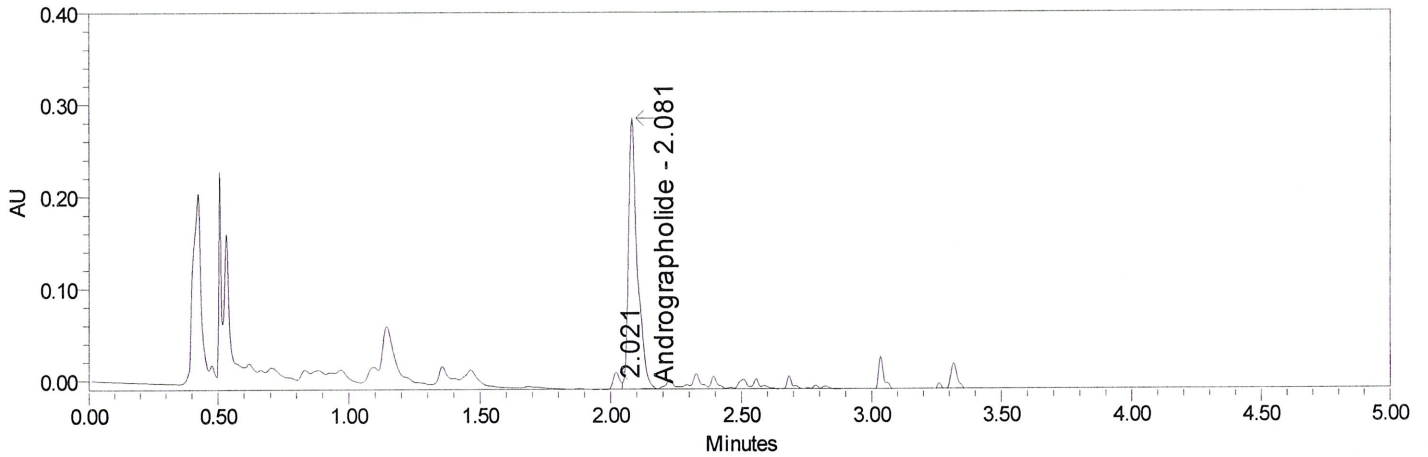

SampleName Kan Jang; Batch\_No 3400195; Vial 1:A,1; Injection 1; Date Acquired 2021-05-05 09:49:02 CEST; Channel Name 223 nm

### Chromatogram

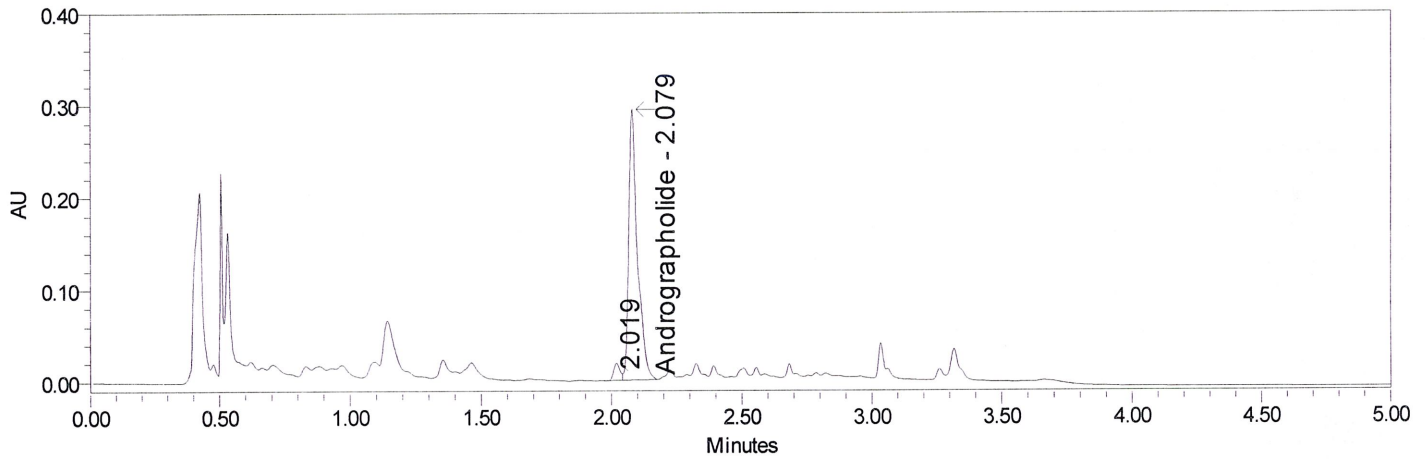

SampleName Kan Jang; Batch\_No 3400195; Vial 1:A,1; Injection 2; Date Acquired 2021-05-05 09:54:53 CEST; Channel Name 223 nm

### Chromatogram

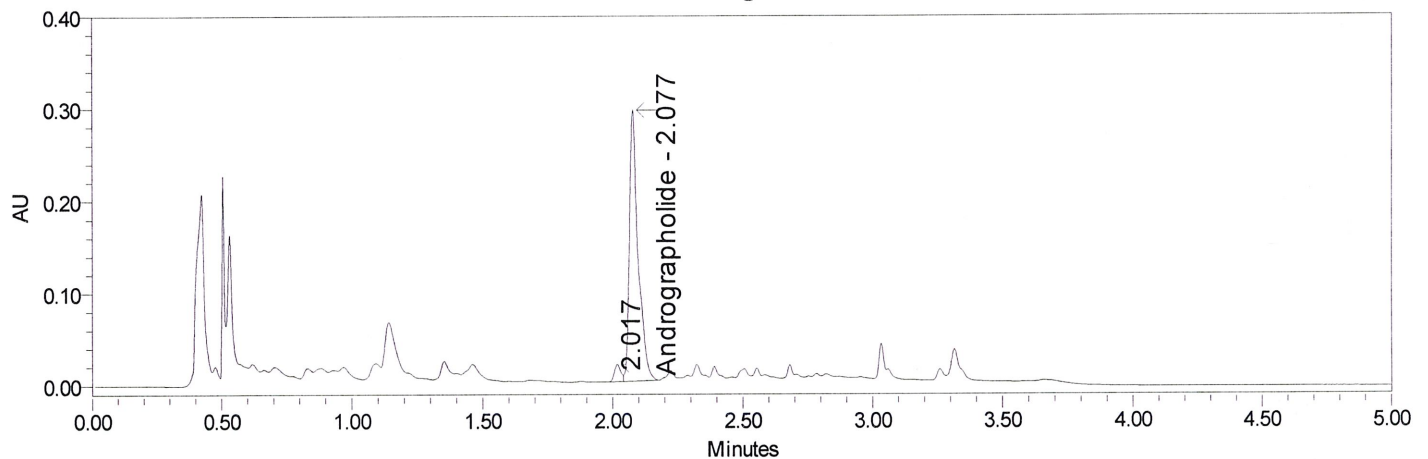

SampleName Kan Jang; Batch\_No 3400195; Vial 1:A,1; Injection 3; Date Acquired 2021-05-05 10:00:44 CEST; Channel Name 223 nm

Sign: 



**Chromatogram**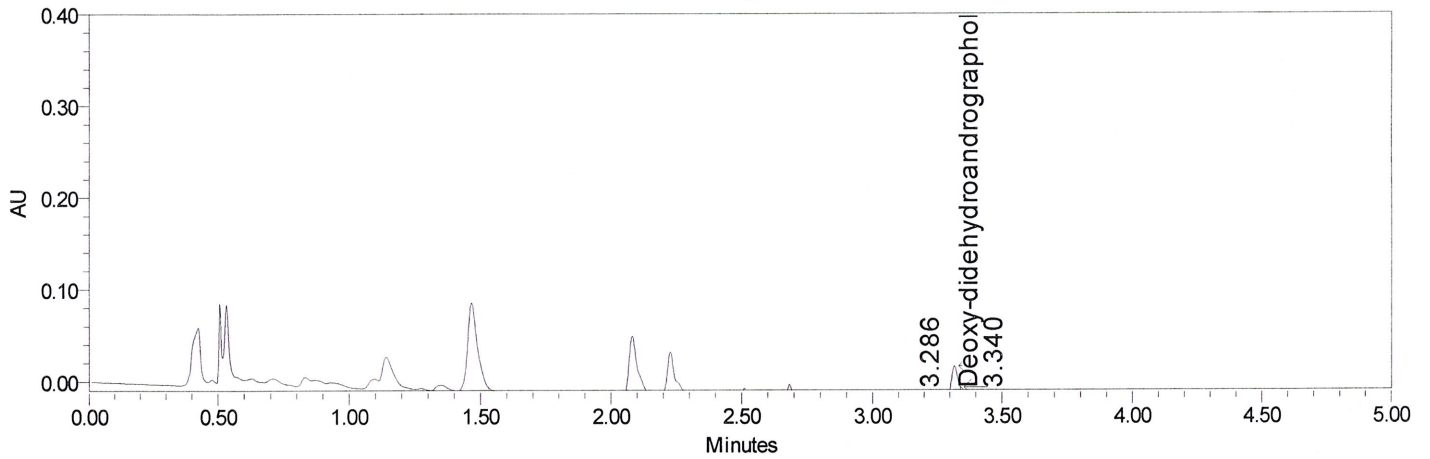

SampleName Kan Jang; Batch\_No 3400195; Vial 1:A,1; Injection 1; Date Acquired 2021-05-05 09:49:02 CEST; Channel Name 254 nm

**Chromatogram**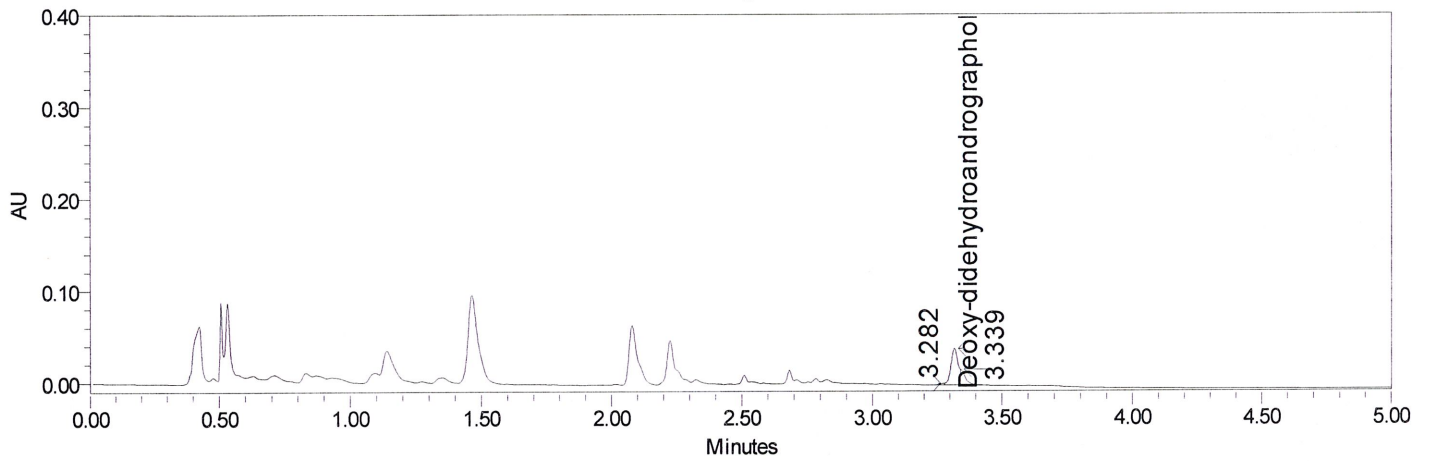

SampleName Kan Jang; Batch\_No 3400195; Vial 1:A,1; Injection 2; Date Acquired 2021-05-05 09:54:53 CEST; Channel Name 254 nm

**Chromatogram**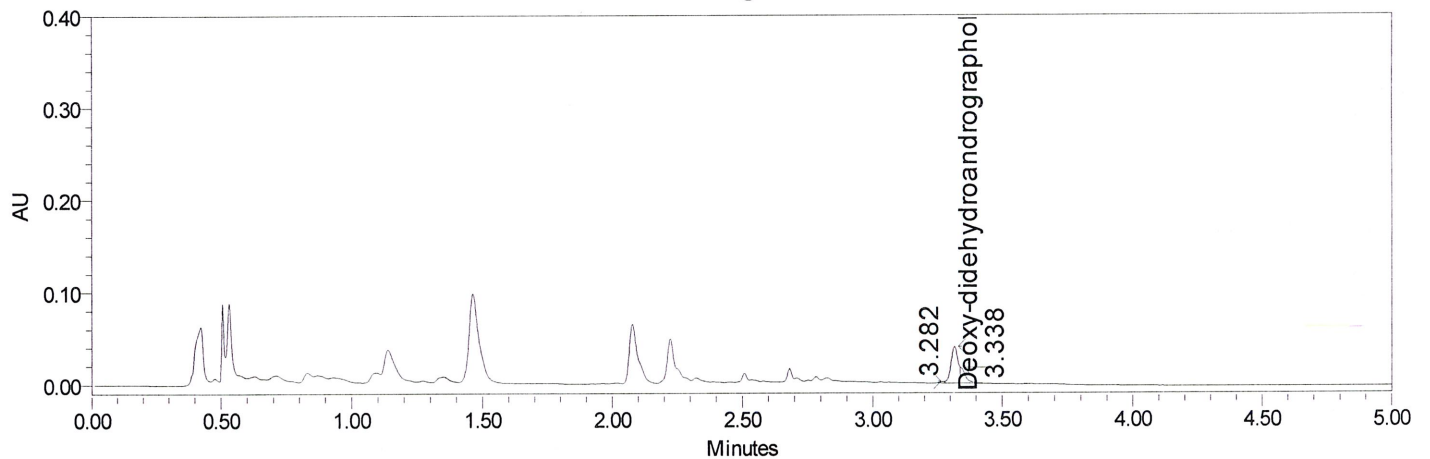

SampleName Kan Jang; Batch\_No 3400195; Vial 1:A,1; Injection 3; Date Acquired 2021-05-05 10:00:44 CEST; Channel Name 254 nm

Sign: 

Sample Name: Kan Jang Andrographis  
Batch No: 3400195

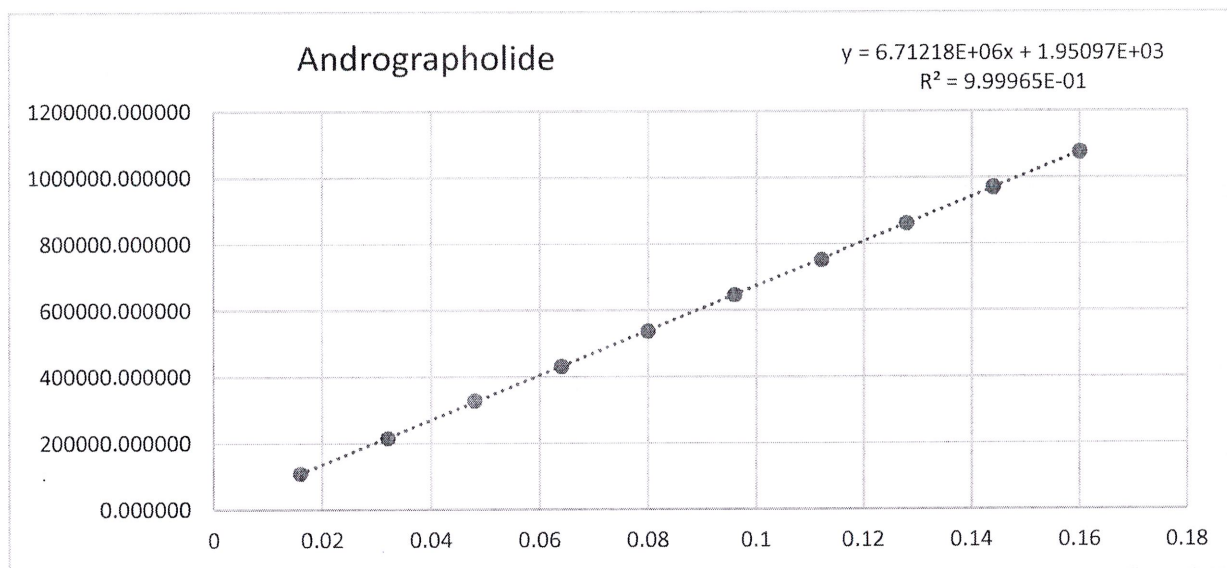

| Injection | Sample Weight | Peakarea | Conc      |
|-----------|---------------|----------|-----------|
| 1         | 3.884         | 686188   | 2.625E-02 |
| 2         | 3.884         | 686984   | 2.628E-02 |
| 3         | 3.884         | 688935   | 2.635E-02 |
| Average   | 3.884         | 687369   | 2.629E-02 |

**Percent amount**  
**2.629**

Tablet weight: 525 mg

Tablet content: 13.80 mg/tab

Date: 2021-05-05

Sign: \_\_\_\_\_

*HL*

Sample Name: Kan Jang Andrographis

Batch No: 3400195

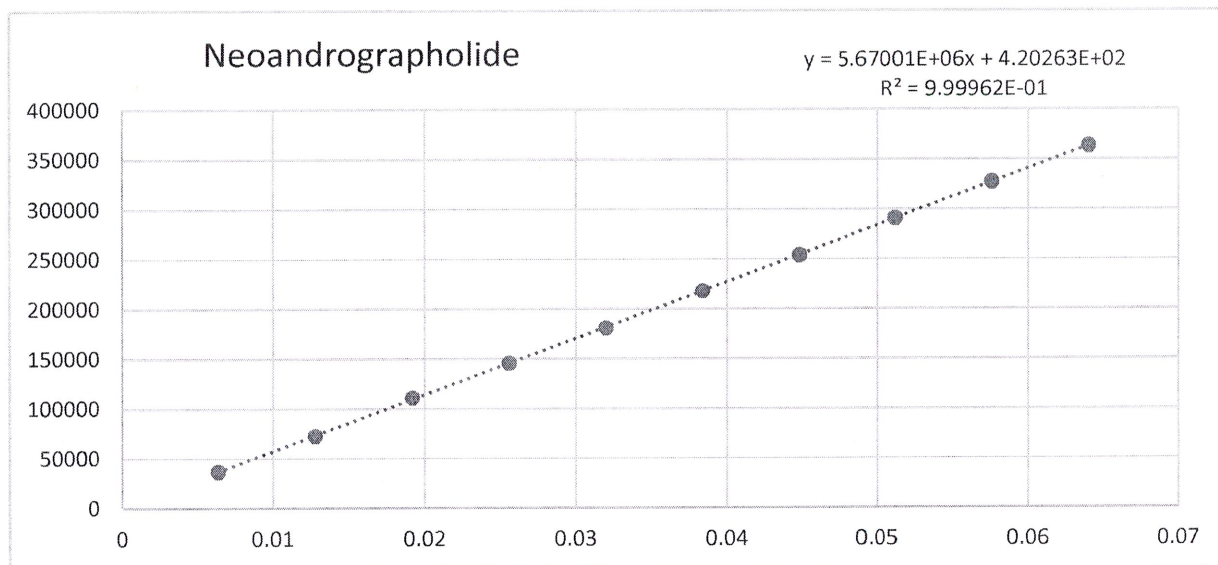

| Injection | Sample Weight | Peakarea | Conc      |
|-----------|---------------|----------|-----------|
| 1         | 3.884         | 162998   | 7.382E-03 |
| 2         | 3.884         | 163340   | 7.398E-03 |
| 3         | 3.884         | 163731   | 7.416E-03 |
| Average   | 3.884         | 163356   | 7.399E-03 |

Percent amount  
0.740

Tablet weight: 525 mg

Tablet content: 3.88 mg/tab

Date: 2021-05-05

Sign: 



Sample Name: Kan Jang Andrographis

Batch No: 3400195

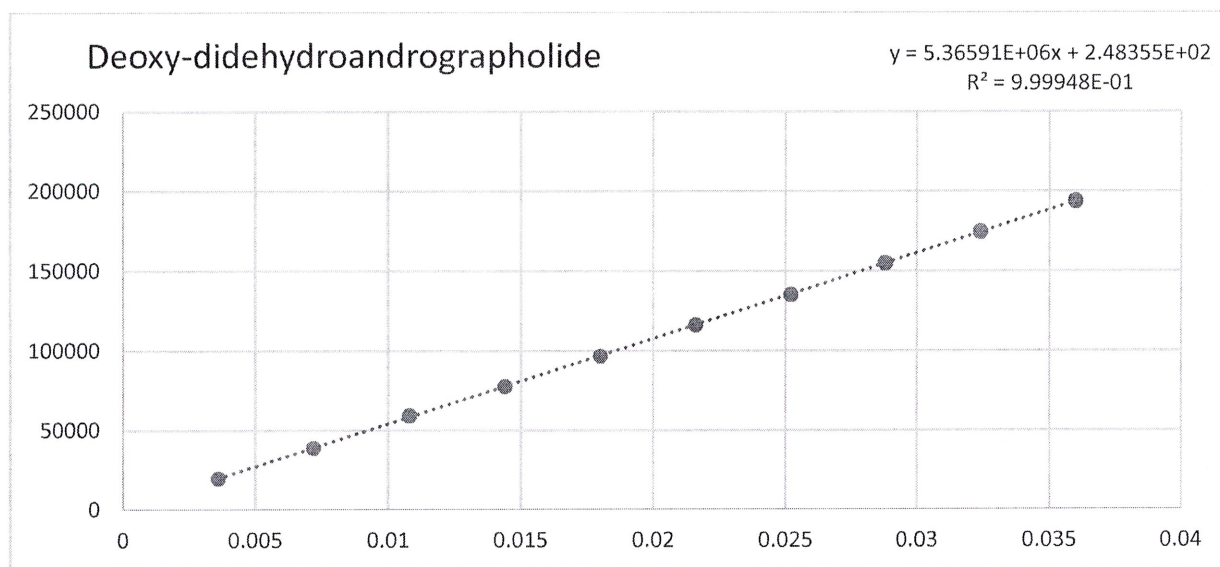

| Injection | Sample Weight | Peakarea | Conc     |
|-----------|---------------|----------|----------|
| 1         | 3.884         | 71523    | 3.42E-03 |
| 2         | 3.884         | 71383    | 3.41E-03 |
| 3         | 3.884         | 71387    | 3.41E-03 |
| Average   | 3.884         | 71431    | 3.42E-03 |

Percent amount

0.342

Tablet weight: 525 mg

Tablet content: 1.79 mg/tab

Date: 2021-05-05

Sign: \_\_\_\_\_

*Handwritten signature*
