# Supplementary material
Source: MDPI journal article supplement (https://www.mdpi.com/1424-8247/15/8/1013)
Supplement: s1 [file s1]

# CASE REPORT FORM

## **Effect of Kan-Jang® supplementation in Patients Diagnosed With COVID-19: A Randomized, Quadruple-blind, Placebo-controlled Trial.**

SPONSOR: Swedish Herbal Institute AB, Sweden

STUDY NO. 2021-02

Treatment random No \_\_\_\_\_

Participant's ID/Subject initials: .....

Investigator signature: \_\_\_\_\_

Tbilisi, Georgia

2022

## TITLE PAGE

|                               |                                                                                                                                                                                                                                                                                                             |
|-------------------------------|-------------------------------------------------------------------------------------------------------------------------------------------------------------------------------------------------------------------------------------------------------------------------------------------------------------|
| <b>Protocol Title</b>         | Effect of Kan-Jang® supplementation in Patients Diagnosed With COVID-19: A Randomized, Quadruple-blind, Placebo-controlled Trial                                                                                                                                                                            |
| <b>Protocol No:</b>           | SHIRD-2021-2                                                                                                                                                                                                                                                                                                |
| <b>Sponsor</b>                | Karl Georg Wikman,<br>Founder & President<br>Swedish Herbal Institute AB.<br>21 Kövlingevägen,<br>Vallberga, 31250, Halland, Sweden<br>Phone: +46-702733753<br>Email: <a href="mailto:karl.georg.wikman@gmail.com">karl.georg.wikman@gmail.com</a><br><a href="https://www.shi.se/">https://www.shi.se/</a> |
| <b>Clinical Trial Site</b>    | The First University Clinic of Tbilisi State Medical University<br>Address: 4 Gudamakari St., 0141 Tbilisi, Georgia<br><a href="https://vipmed.ge/levan-ratiani-en/">https://vipmed.ge/levan-ratiani-en/</a>                                                                                                |
| <b>Principal Investigator</b> | Name Prof. Levan Ratiani - MD, PhD,<br>Signature: _____<br>Date : _____                                                                                                                                                                                                                                     |

## CONFIDENTIALITY STATEMENT

This confidential document is the property of Swedish Herbal Institute AB.  
No unpublished information contained herein may be disclosed without prior written approval from  
Swedish Herbal Institute AB, Sweden  
Access to this document must be restricted to the relevant parties only

## GUIDELINES

### (FOR RECORDING DATA AND COMPLETION OF CASE REPORT FORMS)

1. Make all entries in **BLACK INK** to maximize legibility and facilitate copying.
2. Write legibly and neatly in the space provided.

e.g. : 0 1 or use tick mark in the boxes provided.

3. Use acceptable and uniform medical terminology throughout the CRF.
4. All comments should be brief, concise, clear, and confined to “comment” sections of the CRF. Write comments only if they apply to the study and the topic.
5. For recording subject initials, the first letter of the patient name followed by the first letter of the middle and last name. If there is no middle name the first two letters of the first name and the first letter of the last name should be used. In case of similar initials, the first and last letters of the first name and the first letter of the last name should be used. All initials should follow the same format. If there are more similar initials you can select any letter from the name that will create a unique initial.

For e.g. :

Peter Heck John Initial: P H J

Paul John Initial : PAJ

Pasteur Jennings Initial : PRJ

6. In case of correction DO NOT write over data, erase data, or use correction fluid. Do a straight single cut and write the data nearby with your initial and date of correction. Even if there is only a letter or number error you will have to cut the whole word or number and write above.

e.g. : 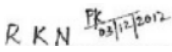 R N K correct       8 1 .0 5 correct      8 1 .0 5 wrong

7. Complete all blanks. If data are missing, use one of the following conventions:

NA (Not Applicable) / ND (Not Done) / UNK (Unknown)

8. Verify all UNITS are recorded as specified in the CRF.
9. TIME to be recorded in a 24 hour clock HH / MM format only.  
e.g.: 1 3 . 5 0 for 1. 50 p.m.

10. Enter all dates only in DD/ MMM / YY format.

e.g.: 10/ OCT / 17

11. Use a **BLACK CARBON SHEET** in between two similar CRF pages to obtain the imprint on the copy page which will be considered the 'Duplicate Copy' of CRF that will remain at the site. The 'Original Copy' will be retrieved by the CRO for Data Entry purposes and documentation thereafter.

12. The investigator must review and sign off each CRF (at the end of each visit) as a confirmation of his/her review

Subject Initials

|  |  |  |
|--|--|--|
|  |  |  |
|--|--|--|

Treatment random no

|  |  |
|--|--|
|  |  |
|--|--|

Date:

|  |  |
|--|--|
|  |  |
|--|--|

Month

|  |  |
|--|--|
|  |  |
|--|--|

Day

|  |  |
|--|--|
|  |  |
|--|--|

Year

## Demographics

Subject First University Clinic Medical Record Number\*:

|  |  |  |  |  |  |  |
|--|--|--|--|--|--|--|
|  |  |  |  |  |  |  |
|--|--|--|--|--|--|--|

First Name\*:

Middle Name (or initial):

Last Name\*:

Birthdate\*:

|  |  |
|--|--|
|  |  |
|--|--|

Month

|  |  |
|--|--|
|  |  |
|--|--|

Day

|  |  |  |  |
|--|--|--|--|
|  |  |  |  |
|--|--|--|--|

Year

### Contact Information:

|                                                                |                                                                 |                                                                |
|----------------------------------------------------------------|-----------------------------------------------------------------|----------------------------------------------------------------|
| Address:                                                       |                                                                 | Unit #:                                                        |
| City:                                                          | State:                                                          | Zip:                                                           |
| Phone Number: <input type="text"/>                             | Alternate Phone Number: <input type="text"/>                    | Email address:                                                 |
| <input type="checkbox"/> Home<br><input type="checkbox"/> Cell | <input type="checkbox"/> Work<br><input type="checkbox"/> Other | <input type="checkbox"/> Home<br><input type="checkbox"/> Cell |
| Preferred method of contact:                                   |                                                                 |                                                                |

### Emergency Contact:

|                                                                |                                                                 |                                                                |
|----------------------------------------------------------------|-----------------------------------------------------------------|----------------------------------------------------------------|
| Name:                                                          |                                                                 |                                                                |
| Address:                                                       |                                                                 | Unit #:                                                        |
| City:                                                          | State:                                                          | Zip:                                                           |
| Phone Number: <input type="text"/>                             | Alternate Phone Number: <input type="text"/>                    | Email address:                                                 |
| <input type="checkbox"/> Home<br><input type="checkbox"/> Cell | <input type="checkbox"/> Work<br><input type="checkbox"/> Other | <input type="checkbox"/> Home<br><input type="checkbox"/> Cell |
| Preferred method of contact:                                   |                                                                 |                                                                |

Form Completed By: \_\_\_\_\_ Date: \_\_\_\_\_

Site PI Signature: \_\_\_\_\_ Date: \_\_\_\_\_

Dr. Levan Ratiani, PhD, MD

Subject Initials  Treatment random no  Date:  /  /

## Informed Consent Authorization Obtained

☐ Consent Refused

Date Signed:  /  /  Time:  :  (using 24 hour format)

| Document(s) signed | Version Date | Approval Date |
|--------------------|--------------|---------------|
| Consent Form       | 2021-03-23   | 2021-03-23    |
|                    |              |               |
|                    |              |               |

Consent Form, and related study documents, was thoroughly reviewed with the subject.

☐ Yes ☐ No

Subject had sufficient time to review the documents and ask questions.

☐ Yes ☐ No

Informed consent/Authorization obtained prior to any study related procedures.

☐ Yes ☐ No

A copy of the signed documents have been given to the subject.

☐ Yes ☐ No

Name of person that obtained consent:

Comments:

## Informed Consent Refused

Time:  :  (using 24 hour format)  
(e.g. hh:mm)

☐ Not Applicable

Comments:

Form Completed by: \_\_\_\_\_ Date: \_\_\_\_\_

Site PI Signature: \_\_\_\_\_ Date: \_\_\_\_\_

# **VISIT 1 - SCREENING**

|                                                                                                                                    |  |                                                                                                                                                                  |  |
|------------------------------------------------------------------------------------------------------------------------------------|--|------------------------------------------------------------------------------------------------------------------------------------------------------------------|--|
| <b>Subject Screening No:</b> _____                                                                                                 |  | <b>Subject Initials :</b> _____                                                                                                                                  |  |
| <b>MEDICATION HISTORY</b>                                                                                                          |  |                                                                                                                                                                  |  |
| Has the patient taken any medication for any illness (past 6 MMMs)<br><br><input type="checkbox"/> Yes <input type="checkbox"/> No |  | Date of :    ____ / ____ / ____<br>Entry        DD        MM        YY                                                                                           |  |
| Medication ( Generic Name):<br><br>Dosage: _____ mg    Frequency: ____ times daily<br><br>Indication:                              |  | Start Date : ____ / ____ / ____<br>DD        MM        YY<br><br>End Date : ____ / ____ / ____<br>DD        MM        YY<br><br><input type="checkbox"/> Ongoing |  |
| Medication ( Generic Name):<br><br>Dosage: _____ mg    Frequency: ____ times daily<br><br>Indication:                              |  | Start Date : ____ / ____ / ____<br>DD        MM        YY<br><br>End Date : ____ / ____ / ____<br>DD        MM        YY<br><br><input type="checkbox"/> Ongoing |  |
| Medication ( Generic Name):<br><br>Dosage: _____ mg    Frequency: ____ times daily<br><br>Indication:                              |  | Start Date : ____ / ____ / ____<br>DD        MM        YY<br><br>End Date : ____ / ____ / ____<br>DD        MM        YY<br><br><input type="checkbox"/> Ongoing |  |
| Medication ( Generic Name):<br><br>Dosage: _____ mg    Frequency: ____ times daily<br><br>Indication:                              |  | Start Date : ____ / ____ / ____<br>DD        MM        YY<br><br>End Date : ____ / ____ / ____<br>DD        MM        YY<br><br><input type="checkbox"/> Ongoing |  |

**Form Completed By:** \_\_\_\_\_ **Date:** \_\_\_\_\_

**Site PI Signature:** \_\_\_\_\_ **Date:** \_\_\_\_\_

### VISIT 1 - SCREENING

**Subject Screening No:** \_ \_ \_ \_ \_

**Subject Initials :** \_ \_ \_ \_

#### PHYSICAL EXAMINATION

Physical Exam Performed: ☐ Yes ☐ No

Date: \_ \_ / \_ \_ / \_ \_  
DD MM YY

| System                    | Normal                   | Abnormal*                | Not done                 | * If Abnormal, comment briefly and indicate CS/ NCS |
|---------------------------|--------------------------|--------------------------|--------------------------|-----------------------------------------------------|
| General Appearance        | <input type="checkbox"/> | <input type="checkbox"/> | <input type="checkbox"/> |                                                     |
| Skin                      | <input type="checkbox"/> | <input type="checkbox"/> | <input type="checkbox"/> |                                                     |
| Eyes, Ears, Nose & Throat | <input type="checkbox"/> | <input type="checkbox"/> | <input type="checkbox"/> |                                                     |
| Head, Neck & Thyroid      | <input type="checkbox"/> | <input type="checkbox"/> | <input type="checkbox"/> |                                                     |
| Cardiovascular            | <input type="checkbox"/> | <input type="checkbox"/> | <input type="checkbox"/> |                                                     |
| Respiratory               | <input type="checkbox"/> | <input type="checkbox"/> | <input type="checkbox"/> |                                                     |
| Abdomen                   | <input type="checkbox"/> | <input type="checkbox"/> | <input type="checkbox"/> |                                                     |
| Extremities               | <input type="checkbox"/> | <input type="checkbox"/> | <input type="checkbox"/> |                                                     |
| Genitalia                 | <input type="checkbox"/> | <input type="checkbox"/> | <input type="checkbox"/> |                                                     |
| Anorectal                 | <input type="checkbox"/> | <input type="checkbox"/> | <input type="checkbox"/> |                                                     |
| Lymph Nodes               | <input type="checkbox"/> | <input type="checkbox"/> | <input type="checkbox"/> |                                                     |
| Muscular-Skeletal         | <input type="checkbox"/> | <input type="checkbox"/> | <input type="checkbox"/> |                                                     |
| Neurological              | <input type="checkbox"/> | <input type="checkbox"/> | <input type="checkbox"/> |                                                     |
| Others (please specify)   | <input type="checkbox"/> | <input type="checkbox"/> | <input type="checkbox"/> |                                                     |

**Form Completed By:** \_\_\_\_\_ **Date:** \_\_\_\_\_

**Site PI Signature:** \_\_\_\_\_ **Date:** \_\_\_\_\_



# VISIT 1 - SCREENING.

|                                                                                                                             |                                                                                                                                                                  |
|-----------------------------------------------------------------------------------------------------------------------------|------------------------------------------------------------------------------------------------------------------------------------------------------------------|
| <b>Subject Screening No:</b> _____ <b>Subject Initials:</b> _____                                                           |                                                                                                                                                                  |
| <b>CONCOMITANT MEDICATION</b>                                                                                               |                                                                                                                                                                  |
| At the time of screening is the patient taking any medications.<br><input type="checkbox"/> Yes <input type="checkbox"/> No | Date of :    ____ / ____ / ____<br>Entry            DD        MM        YY                                                                                       |
| Medication ( Generic Name):<br><br>Dosage: _____ mg    Frequency: ____ times daily<br><br>Indication:                       | Start Date : ____ / ____ / ____<br>DD        MM        YY<br><br>End Date : ____ / ____ / ____<br>DD        MM        YY<br><br><input type="checkbox"/> Ongoing |
| Medication ( Generic Name):<br><br>Dosage: _____ mg    Frequency: ____ times daily<br><br>Indication:                       | Start Date : ____ / ____ / ____<br>DD        MM        YY<br><br>End Date : ____ / ____ / ____<br>DD        MM        YY<br><br><input type="checkbox"/> Ongoing |
| Medication ( Generic Name):<br><br>Dosage: _____ mg    Frequency: ____ times daily<br><br>Indication:                       | Start Date : ____ / ____ / ____<br>DD        MM        YY<br><br>End Date : ____ / ____ / ____<br>DD        MM        YY<br><br><input type="checkbox"/> Ongoing |
| Medication ( Generic Name):<br><br>Dosage: _____ mg    Frequency: ____ times daily<br><br>Indication:                       | Start Date : ____ / ____ / ____<br>DD        MM        YY<br><br>End Date : ____ / ____ / ____<br>DD        MM        YY<br><br><input type="checkbox"/> Ongoing |

**Form Completed By:** \_\_\_\_\_ **Date:** \_\_\_\_\_

**Site PI Signature:** \_\_\_\_\_ **Date:** \_\_\_\_\_

## VISIT 1 - SCREENING

**Subject Screening No:** \_\_\_\_\_

**Subject Initials :** \_\_\_\_\_

### LABORATORY INVESTIGATION

Was blood collected in this visit?

☐ Yes ☐ No

Quantity : \_\_\_\_ mL

Time : \_\_\_\_ : \_\_\_\_  
Hour Min

Date of : \_\_\_\_ / \_\_\_\_ / \_\_\_\_

Collection DD MM YY

Date of : \_\_\_\_ / \_\_\_\_ / \_\_\_\_

Report DD MM YY

### Visits

| Parameter                  | Normal Reference Range | Visit 1<br>Day 1<br>Baseline | Day 3 | Visit 2<br>Day 7 | Visit 3<br>Day 14 | Visit 4<br>Day 21<br>Follow up |
|----------------------------|------------------------|------------------------------|-------|------------------|-------------------|--------------------------------|
| SARS-Cov2 PCR test         |                        |                              |       |                  |                   |                                |
| Blood serum IL-6,<br>pg/ml |                        |                              |       |                  |                   |                                |
| D-Dimer                    |                        |                              |       |                  |                   |                                |
| C-reactive protein         |                        |                              |       |                  |                   |                                |

### Liver and Renal Function Tests

|                                        |                          |                          |                          |
|----------------------------------------|--------------------------|--------------------------|--------------------------|
| AST(aspartate amino transferase, SGOT) | <input type="checkbox"/> | <input type="checkbox"/> | <input type="checkbox"/> |
| ALT (alanine aminotransferase, SGPT)   | <input type="checkbox"/> | <input type="checkbox"/> | <input type="checkbox"/> |

**Form Completed By:** \_\_\_\_\_ **Date:** \_\_\_\_\_

**Site PI Signature:** \_\_\_\_\_ **Date:** \_\_\_\_\_

# VISIT 1 - SCREENING

| Subject Screening No: _____ |       |                 | Subject Initials : _____ |                          |                          |
|-----------------------------|-------|-----------------|--------------------------|--------------------------|--------------------------|
| Complete Blood Count        |       |                 |                          |                          |                          |
| Parameter                   | Value | Reference Range | CS                       | NCS                      | ND                       |
| Hemoglobin                  |       |                 | <input type="checkbox"/> | <input type="checkbox"/> | <input type="checkbox"/> |
| RBC                         |       |                 | <input type="checkbox"/> | <input type="checkbox"/> | <input type="checkbox"/> |
| Hematocrit                  |       |                 | <input type="checkbox"/> | <input type="checkbox"/> | <input type="checkbox"/> |
| Total Leukocyte count       |       |                 | <input type="checkbox"/> | <input type="checkbox"/> | <input type="checkbox"/> |
| Total Lymphocyte count      |       |                 | <input type="checkbox"/> | <input type="checkbox"/> | <input type="checkbox"/> |
| Absolute Neutrophil count   |       |                 | <input type="checkbox"/> | <input type="checkbox"/> | <input type="checkbox"/> |
| Eosinophil count            |       |                 | <input type="checkbox"/> | <input type="checkbox"/> | <input type="checkbox"/> |
| Basophil Count              |       |                 | <input type="checkbox"/> | <input type="checkbox"/> | <input type="checkbox"/> |
| Monocyte count              |       |                 | <input type="checkbox"/> | <input type="checkbox"/> | <input type="checkbox"/> |
| Platelet Count              |       |                 | <input type="checkbox"/> | <input type="checkbox"/> | <input type="checkbox"/> |
| ESR                         |       |                 | <input type="checkbox"/> | <input type="checkbox"/> | <input type="checkbox"/> |
|                             |       |                 |                          |                          |                          |

Form Completed By: \_\_\_\_\_ Date: \_\_\_\_\_

Site PI Signature: \_\_\_\_\_ Date: \_\_\_\_\_

## VISIT 1 - SCREENING

**Subject Initials**   
**Treatment random** no  
**Date:**   /   /    
Month Day Year

## Eligibility Criteria

### Inclusion Criteria

Patients who meet *all* of the following criteria are eligible for enrollment as study participants:

|                                                                                                                                                         | Yes | No |
|---------------------------------------------------------------------------------------------------------------------------------------------------------|-----|----|
| COVID-19 patients with confirmed diagnosis based on positive SARS-Cov-2 test (in the last 7 days) and at least three of COVID-19 symptoms listed below: |     |    |
| • fatigue (asthenia)                                                                                                                                    |     |    |
| • headache,                                                                                                                                             |     |    |
| • loss of smell                                                                                                                                         |     |    |
| • gustatory dysfunction                                                                                                                                 |     |    |
| • rhinorrhea,                                                                                                                                           |     |    |
| • nasal congestions                                                                                                                                     |     |    |
| • cough                                                                                                                                                 |     |    |
| • sore throat,                                                                                                                                          |     |    |
| • myalgia                                                                                                                                               |     |    |
| • fever (high temperature)                                                                                                                              |     |    |
| COVID-19 patient in stable moderate condition (i.e., not requiring Intensive Care Unit (ICU) admission).                                                |     |    |
| Subjects must be under observation or admitted to a controlled facility or hospital (home quarantine is not sufficient).                                |     |    |
| Able to take medication alone;                                                                                                                          |     |    |
| Able to understand and provide signed informed consent;                                                                                                 |     |    |
| Able to participate in a 3-week study.                                                                                                                  |     |    |
| 18 Years and older (Adult, Older Adult)                                                                                                                 |     |    |
| <b>The patient meets the inclusion criteria</b>                                                                                                         |     |    |

**Form Completed By:** \_\_\_\_\_ **Date:** \_\_\_\_\_

**Site PI Signature:** \_\_\_\_\_ **Date:** \_\_\_\_\_

## VISIT 1 - SCREENING

Subject Initials

  

Treatment random no

 

Date:

  /

  /

 

Month

Day

Year

## Eligibility Criteria

### Exclusion Criteria

Patients who meet *any* of these criteria are *not* eligible for enrollment as study participants:

|                                                                                                                              | Yes | No |
|------------------------------------------------------------------------------------------------------------------------------|-----|----|
| Pulmonary diseases                                                                                                           |     |    |
| Chronic pulmonary diseases                                                                                                   |     |    |
| Chronic rhinosinusitis                                                                                                       |     |    |
| Patient admitted already under invasive mechanical ventilation;                                                              |     |    |
| Patient admitted with severe acute respiratory syndrome and diagnosed with an etiologic agent other than Covid 19;           |     |    |
| Renal failure requiring dialysis or creatinine $\geq 2.0$ mg/dl;                                                             |     |    |
| Tube feeding or parenteral nutrition.                                                                                        |     |    |
| Respiratory decompensation requiring mechanical ventilation.                                                                 |     |    |
| Uncontrolled diabetes type 2.                                                                                                |     |    |
| Hypertension stage 3,                                                                                                        |     |    |
| Autoimmune disease.                                                                                                          |     |    |
| Pregnant or lactating women.                                                                                                 |     |    |
| Taking antibiotics for a reason other than COVID-19 at enrollment.                                                           |     |    |
| Has a chronically weakened immune system (AIDS, lymphoma, chemo-radio- corticosteroid therapy, immunosuppressive pathology); |     |    |
| Was treated with chemo-radio-corticosteroid therapy in the last 6 months.                                                    |     |    |
| Has active cancer.                                                                                                           |     |    |
| Taking immunosuppressive drugs (e.g. anti-rejection treatment after organ transplant);                                       |     |    |
| Already participating in another clinical trial;                                                                             |     |    |
| Has any other condition that would prevent safe participation in the study                                                   |     |    |
| <b>The patient meets the exclusion criteria</b>                                                                              |     |    |

**Declaration by the principal investigator:** I have verified the data entered in the Screening Visit for this subject and certify that it is accurate and complete.

**Form Completed by:** \_\_\_\_\_ **Date:** \_\_\_\_\_

**Site PI Signature:** \_\_\_\_\_ **Date:** \_\_\_\_\_

VISIT 1 - SCREENING

Subject Initials  Treatment random no  Date:  /  /   
Month Day Year

START OF SYMPTOMS: (When did you first experience the first signs of COVID symptoms?)

☐ 0-1 days ago

☐ 1-2 days ago

☐ 2-3 days ago

☐ 4-7 days ago

Form Completed By: \_\_\_\_\_ Date: \_\_\_\_\_

Site PI Signature: \_\_\_\_\_ Date: \_\_\_\_\_

Subject Initials  Treatment random no  Date:  /  /

**VISIT 1 - SCREENING**

|                                                                                                                                |                     |                                      |                                                          |
|--------------------------------------------------------------------------------------------------------------------------------|---------------------|--------------------------------------|----------------------------------------------------------|
| Subject Random No: _____                                                                                                       |                     | Subject Initials : _____             |                                                          |
| <b>TREATMENT ALLOCATION</b>                                                                                                    |                     |                                      |                                                          |
| Was the patient is allocated to a treatment arm?<br><br>Yes <input type="checkbox"/> No <input type="checkbox"/>               |                     | Date: ____ / ____ / ____<br>DD MM YY |                                                          |
| Randomization number given:<br>_____                                                                                           | Bottle No:<br>_____ | No: of capsules<br>_____             | Batch No:<br>_____/____                                  |
| <b>CONCOMITANT MEDICATION</b>                                                                                                  |                     |                                      |                                                          |
| Are there any changes in concomitant medication since the last visit?<br><br>If yes, record on the Concomitant Medication Log. |                     |                                      | Yes <input type="checkbox"/> No <input type="checkbox"/> |
| <b>INVESTIGATOR VERIFICATION</b>                                                                                               |                     |                                      |                                                          |
| I have verified the data entered in Visit 3 for this subject and certify that it is accurate and complete.                     |                     |                                      |                                                          |

Form Completed By: \_\_\_\_\_ Date: \_\_\_\_\_

Site PI Signature: \_\_\_\_\_ Date: \_\_\_\_\_

## VISIT 1

### Day 1: Baseline

The URTI symptom score is calculated by summing of 10 URTI symptom questions. \_\_\_\_\_

The QOL score is calculated by summing of 9 QOL questions during the study. \_\_\_\_\_

The total URTI symptom is an overall condition expressed by summing of URTI symptom and QOL scores: \_\_\_\_\_

#### Wisconsin Upper Respiratory Symptom Survey – 21 --- Daily Symptom Report

|             |              |              |            |
|-------------|--------------|--------------|------------|
| <i>Day:</i> | <i>Date:</i> | <i>Time:</i> | <i>ID:</i> |
|-------------|--------------|--------------|------------|

Please fill in one circle for each of the following items:

|                                     | Not sick<br>0         | Very mildly<br>1      | 2                     | Mildly<br>3           | 4                     | Moderately<br>5       | 6                     | Severely<br>7         |
|-------------------------------------|-----------------------|-----------------------|-----------------------|-----------------------|-----------------------|-----------------------|-----------------------|-----------------------|
| How sick do you feel <b>today</b> ? | <input type="radio"/> |

Please rate the **average severity of your cold symptoms over the last 24 hours** for each symptom:

| <b>URT</b> symptom | Do not have this symptom<br>0 | Very mild<br>1        | 2                     | Mild<br>3             | 4                     | Moderate<br>5         | 6                     | Severe<br>7           |
|--------------------|-------------------------------|-----------------------|-----------------------|-----------------------|-----------------------|-----------------------|-----------------------|-----------------------|
| Runny nose         | <input type="radio"/>         | <input type="radio"/> | <input type="radio"/> | <input type="radio"/> | <input type="radio"/> | <input type="radio"/> | <input type="radio"/> | <input type="radio"/> |
| Plugged nose       | <input type="radio"/>         | <input type="radio"/> | <input type="radio"/> | <input type="radio"/> | <input type="radio"/> | <input type="radio"/> | <input type="radio"/> | <input type="radio"/> |
| Sneezing           | <input type="radio"/>         | <input type="radio"/> | <input type="radio"/> | <input type="radio"/> | <input type="radio"/> | <input type="radio"/> | <input type="radio"/> | <input type="radio"/> |
| Sore throat        | <input type="radio"/>         | <input type="radio"/> | <input type="radio"/> | <input type="radio"/> | <input type="radio"/> | <input type="radio"/> | <input type="radio"/> | <input type="radio"/> |
| Scratchy throat    | <input type="radio"/>         | <input type="radio"/> | <input type="radio"/> | <input type="radio"/> | <input type="radio"/> | <input type="radio"/> | <input type="radio"/> | <input type="radio"/> |
| Cough              | <input type="radio"/>         | <input type="radio"/> | <input type="radio"/> | <input type="radio"/> | <input type="radio"/> | <input type="radio"/> | <input type="radio"/> | <input type="radio"/> |
| Hoarseness         | <input type="radio"/>         | <input type="radio"/> | <input type="radio"/> | <input type="radio"/> | <input type="radio"/> | <input type="radio"/> | <input type="radio"/> | <input type="radio"/> |
| Head congestion    | <input type="radio"/>         | <input type="radio"/> | <input type="radio"/> | <input type="radio"/> | <input type="radio"/> | <input type="radio"/> | <input type="radio"/> | <input type="radio"/> |
| Chest congestion   | <input type="radio"/>         | <input type="radio"/> | <input type="radio"/> | <input type="radio"/> | <input type="radio"/> | <input type="radio"/> | <input type="radio"/> | <input type="radio"/> |
| Feeling tired      | <input type="radio"/>         | <input type="radio"/> | <input type="radio"/> | <input type="radio"/> | <input type="radio"/> | <input type="radio"/> | <input type="radio"/> | <input type="radio"/> |

Over the last 24 hours, how much has your cold interfered with your ability to:

| <b>QOL measures</b>          | Not at all<br>0       | Very mildly<br>1      | 2                     | Mildly<br>3           | 4                     | Moderately<br>5       | 6                     | Severely<br>7         |
|------------------------------|-----------------------|-----------------------|-----------------------|-----------------------|-----------------------|-----------------------|-----------------------|-----------------------|
| Think clearly                | <input type="radio"/> |
| Sleep well                   | <input type="radio"/> |
| Breathe easily               | <input type="radio"/> |
| Walk, climb stairs, exercise | <input type="radio"/> |
| Accomplish daily activities  | <input type="radio"/> |
| Work outside the home        | <input type="radio"/> |
| Work inside the home         | <input type="radio"/> |
| Interact with others         | <input type="radio"/> |
| Live your personal life      | <input type="radio"/> |

Compared to yesterday, I feel that my cold is...

| Very much better      | Somewhat better       | A little better       | The same              | A little worse        | Somewhat worse        | Very much worse       |
|-----------------------|-----------------------|-----------------------|-----------------------|-----------------------|-----------------------|-----------------------|
| <input type="radio"/> |



## Day 3

The URTI symptom score is calculated by summing of 10 URTI symptom questions. \_\_\_\_\_

The QOL score is calculated by summing of 9 QOL questions during the study. \_\_\_\_\_

The total URTI symptom is an overall condition expressed by summing of URTI symptom and QOL scores: \_\_\_\_\_

### Wisconsin Upper Respiratory Symptom Survey – 21 --- Daily Symptom Report

|      |       |       |     |
|------|-------|-------|-----|
| Day: | Date: | Time: | ID: |
|------|-------|-------|-----|

Please fill in one circle for each of the following items:

|                             | Not sick<br>0         | Very mildly<br>1      | 2                     | Mildly<br>3           | 4                     | Moderately<br>5       | 6                     | Severely<br>7         |
|-----------------------------|-----------------------|-----------------------|-----------------------|-----------------------|-----------------------|-----------------------|-----------------------|-----------------------|
| How sick do you feel today? | <input type="radio"/> |

Please rate the average severity of your cold symptoms over the last 24 hours for each symptom:

| URT <sup>U</sup> symptom | Do not have this symptom<br>0 | Very mild<br>1        | 2                     | Mild<br>3             | 4                     | Moderate<br>5         | 6                     | Severe<br>7           |
|--------------------------|-------------------------------|-----------------------|-----------------------|-----------------------|-----------------------|-----------------------|-----------------------|-----------------------|
| Runny nose               | <input type="radio"/>         | <input type="radio"/> | <input type="radio"/> | <input type="radio"/> | <input type="radio"/> | <input type="radio"/> | <input type="radio"/> | <input type="radio"/> |
| Plugged nose             | <input type="radio"/>         | <input type="radio"/> | <input type="radio"/> | <input type="radio"/> | <input type="radio"/> | <input type="radio"/> | <input type="radio"/> | <input type="radio"/> |
| Sneezing                 | <input type="radio"/>         | <input type="radio"/> | <input type="radio"/> | <input type="radio"/> | <input type="radio"/> | <input type="radio"/> | <input type="radio"/> | <input type="radio"/> |
| Sore throat              | <input type="radio"/>         | <input type="radio"/> | <input type="radio"/> | <input type="radio"/> | <input type="radio"/> | <input type="radio"/> | <input type="radio"/> | <input type="radio"/> |
| Scratchy throat          | <input type="radio"/>         | <input type="radio"/> | <input type="radio"/> | <input type="radio"/> | <input type="radio"/> | <input type="radio"/> | <input type="radio"/> | <input type="radio"/> |
| Cough                    | <input type="radio"/>         | <input type="radio"/> | <input type="radio"/> | <input type="radio"/> | <input type="radio"/> | <input type="radio"/> | <input type="radio"/> | <input type="radio"/> |
| Hoarseness               | <input type="radio"/>         | <input type="radio"/> | <input type="radio"/> | <input type="radio"/> | <input type="radio"/> | <input type="radio"/> | <input type="radio"/> | <input type="radio"/> |
| Head congestion          | <input type="radio"/>         | <input type="radio"/> | <input type="radio"/> | <input type="radio"/> | <input type="radio"/> | <input type="radio"/> | <input type="radio"/> | <input type="radio"/> |
| Chest congestion         | <input type="radio"/>         | <input type="radio"/> | <input type="radio"/> | <input type="radio"/> | <input type="radio"/> | <input type="radio"/> | <input type="radio"/> | <input type="radio"/> |
| Feeling tired            | <input type="radio"/>         | <input type="radio"/> | <input type="radio"/> | <input type="radio"/> | <input type="radio"/> | <input type="radio"/> | <input type="radio"/> | <input type="radio"/> |

Over the last 24 hours, how much has your cold interfered with your ability to:

| QOL measures                 | Not at all<br>0       | Very mildly<br>1      | 2                     | Mildly<br>3           | 4                     | Moderately<br>5       | 6                     | Severely<br>7         |
|------------------------------|-----------------------|-----------------------|-----------------------|-----------------------|-----------------------|-----------------------|-----------------------|-----------------------|
| Think clearly                | <input type="radio"/> |
| Sleep well                   | <input type="radio"/> |
| Breathe easily               | <input type="radio"/> |
| Walk, climb stairs, exercise | <input type="radio"/> |
| Accomplish daily activities  | <input type="radio"/> |
| Work outside the home        | <input type="radio"/> |
| Work inside the home         | <input type="radio"/> |
| Interact with others         | <input type="radio"/> |
| Live your personal life      | <input type="radio"/> |

Compared to yesterday, I feel that my cold is...

| Very much better      | Somewhat better       | A little better       | The same              | A little worse        | Somewhat worse        | Very much worse       |
|-----------------------|-----------------------|-----------------------|-----------------------|-----------------------|-----------------------|-----------------------|
| <input type="radio"/> |

## VISIT 2

### Day 7

The URTI symptom score is calculated by summing of 10 URTI symptom questions. \_\_\_\_\_

The QOL score is calculated by summing of 9 QOL questions during the study. \_\_\_\_\_

The total URTI symptom is an overall condition expressed by summing of URTI symptom and QOL scores: \_\_\_\_\_

#### Wisconsin Upper Respiratory Symptom Survey – 21 --- Daily Symptom Report

|      |       |       |     |
|------|-------|-------|-----|
| Day: | Date: | Time: | ID: |
|------|-------|-------|-----|

Please fill in one circle for each of the following items:

|                                     | Not<br>sick<br>0      | Very<br>mildly<br>1   | 2                     | Mildly<br>3           | 4                     | Moderately<br>5       | 6                     | Severely<br>7         |
|-------------------------------------|-----------------------|-----------------------|-----------------------|-----------------------|-----------------------|-----------------------|-----------------------|-----------------------|
| How sick do you feel <b>today</b> ? | <input type="radio"/> |

Please rate the **average severity of your cold symptoms over the last 24 hours** for each symptom:

| URT <sup>U</sup> symptom | Do not have<br>this symptom<br>0 | Very<br>mild<br>1     | 2                     | Mild<br>3             | 4                     | Moderate<br>5         | 6                     | Severe<br>7           |
|--------------------------|----------------------------------|-----------------------|-----------------------|-----------------------|-----------------------|-----------------------|-----------------------|-----------------------|
| Runny nose               | <input type="radio"/>            | <input type="radio"/> | <input type="radio"/> | <input type="radio"/> | <input type="radio"/> | <input type="radio"/> | <input type="radio"/> | <input type="radio"/> |
| Plugged nose             | <input type="radio"/>            | <input type="radio"/> | <input type="radio"/> | <input type="radio"/> | <input type="radio"/> | <input type="radio"/> | <input type="radio"/> | <input type="radio"/> |
| Sneezing                 | <input type="radio"/>            | <input type="radio"/> | <input type="radio"/> | <input type="radio"/> | <input type="radio"/> | <input type="radio"/> | <input type="radio"/> | <input type="radio"/> |
| Sore throat              | <input type="radio"/>            | <input type="radio"/> | <input type="radio"/> | <input type="radio"/> | <input type="radio"/> | <input type="radio"/> | <input type="radio"/> | <input type="radio"/> |
| Scratchy throat          | <input type="radio"/>            | <input type="radio"/> | <input type="radio"/> | <input type="radio"/> | <input type="radio"/> | <input type="radio"/> | <input type="radio"/> | <input type="radio"/> |
| Cough                    | <input type="radio"/>            | <input type="radio"/> | <input type="radio"/> | <input type="radio"/> | <input type="radio"/> | <input type="radio"/> | <input type="radio"/> | <input type="radio"/> |
| Hoarseness               | <input type="radio"/>            | <input type="radio"/> | <input type="radio"/> | <input type="radio"/> | <input type="radio"/> | <input type="radio"/> | <input type="radio"/> | <input type="radio"/> |
| Head congestion          | <input type="radio"/>            | <input type="radio"/> | <input type="radio"/> | <input type="radio"/> | <input type="radio"/> | <input type="radio"/> | <input type="radio"/> | <input type="radio"/> |
| Chest congestion         | <input type="radio"/>            | <input type="radio"/> | <input type="radio"/> | <input type="radio"/> | <input type="radio"/> | <input type="radio"/> | <input type="radio"/> | <input type="radio"/> |
| Feeling tired            | <input type="radio"/>            | <input type="radio"/> | <input type="radio"/> | <input type="radio"/> | <input type="radio"/> | <input type="radio"/> | <input type="radio"/> | <input type="radio"/> |

Over the last 24 hours, how much has your cold interfered with your ability to:

| QOL measures                 | Not<br>at all<br>0    | Very<br>mildly<br>1   | 2                     | Mildly<br>3           | 4                     | Moderately<br>5       | 6                     | Severely<br>7         |
|------------------------------|-----------------------|-----------------------|-----------------------|-----------------------|-----------------------|-----------------------|-----------------------|-----------------------|
| Think clearly                | <input type="radio"/> |
| Sleep well                   | <input type="radio"/> |
| Breathe easily               | <input type="radio"/> |
| Walk, climb stairs, exercise | <input type="radio"/> |
| Accomplish daily activities  | <input type="radio"/> |
| Work outside the home        | <input type="radio"/> |
| Work inside the home         | <input type="radio"/> |
| Interact with others         | <input type="radio"/> |
| Live your personal life      | <input type="radio"/> |

Compared to yesterday, I feel that my cold is...

| Very much<br>better   | Somewhat<br>better    | A little<br>better    | The same              | A little<br>worse     | Somewhat<br>worse     | Very much<br>worse    |
|-----------------------|-----------------------|-----------------------|-----------------------|-----------------------|-----------------------|-----------------------|
| <input type="radio"/> |

## VISIT 3

### Day 14

The URTI symptom score is calculated by summing of 10 URTI symptom questions. \_\_\_\_\_

The QOL score is calculated by summing of 9 QOL questions during the study. \_\_\_\_\_

The total URTI symptom is an overall condition expressed by summing of URTI symptom and QOL scores: \_\_\_\_\_

#### Wisconsin Upper Respiratory Symptom Survey – 21 --- Daily Symptom Report

|      |       |       |     |
|------|-------|-------|-----|
| Day: | Date: | Time: | ID: |
|------|-------|-------|-----|

Please fill in one circle for each of the following items:

|                             | Not sick<br>0         | Very mildly<br>1      | 2                     | Mildly<br>3           | 4                     | Moderately<br>5       | 6                     | Severely<br>7         |
|-----------------------------|-----------------------|-----------------------|-----------------------|-----------------------|-----------------------|-----------------------|-----------------------|-----------------------|
| How sick do you feel today? | <input type="radio"/> |

Please rate the **average severity of your cold symptoms over the last 24 hours** for each symptom:

| URT <sup>1</sup> symptom | Do not have this symptom<br>0 | Very mild<br>1        | 2                     | Mild<br>3             | 4                     | Moderate<br>5         | 6                     | Severe<br>7           |
|--------------------------|-------------------------------|-----------------------|-----------------------|-----------------------|-----------------------|-----------------------|-----------------------|-----------------------|
| Runny nose               | <input type="radio"/>         | <input type="radio"/> | <input type="radio"/> | <input type="radio"/> | <input type="radio"/> | <input type="radio"/> | <input type="radio"/> | <input type="radio"/> |
| Plugged nose             | <input type="radio"/>         | <input type="radio"/> | <input type="radio"/> | <input type="radio"/> | <input type="radio"/> | <input type="radio"/> | <input type="radio"/> | <input type="radio"/> |
| Sneezing                 | <input type="radio"/>         | <input type="radio"/> | <input type="radio"/> | <input type="radio"/> | <input type="radio"/> | <input type="radio"/> | <input type="radio"/> | <input type="radio"/> |
| Sore throat              | <input type="radio"/>         | <input type="radio"/> | <input type="radio"/> | <input type="radio"/> | <input type="radio"/> | <input type="radio"/> | <input type="radio"/> | <input type="radio"/> |
| Scratchy throat          | <input type="radio"/>         | <input type="radio"/> | <input type="radio"/> | <input type="radio"/> | <input type="radio"/> | <input type="radio"/> | <input type="radio"/> | <input type="radio"/> |
| Cough                    | <input type="radio"/>         | <input type="radio"/> | <input type="radio"/> | <input type="radio"/> | <input type="radio"/> | <input type="radio"/> | <input type="radio"/> | <input type="radio"/> |
| Hoarseness               | <input type="radio"/>         | <input type="radio"/> | <input type="radio"/> | <input type="radio"/> | <input type="radio"/> | <input type="radio"/> | <input type="radio"/> | <input type="radio"/> |
| Head congestion          | <input type="radio"/>         | <input type="radio"/> | <input type="radio"/> | <input type="radio"/> | <input type="radio"/> | <input type="radio"/> | <input type="radio"/> | <input type="radio"/> |
| Chest congestion         | <input type="radio"/>         | <input type="radio"/> | <input type="radio"/> | <input type="radio"/> | <input type="radio"/> | <input type="radio"/> | <input type="radio"/> | <input type="radio"/> |
| Feeling tired            | <input type="radio"/>         | <input type="radio"/> | <input type="radio"/> | <input type="radio"/> | <input type="radio"/> | <input type="radio"/> | <input type="radio"/> | <input type="radio"/> |

Over the last 24 hours, how much has your cold interfered with your ability to:

| QOL measures                 | Not at all<br>0       | Very mildly<br>1      | 2                     | Mildly<br>3           | 4                     | Moderately<br>5       | 6                     | Severely<br>7         |
|------------------------------|-----------------------|-----------------------|-----------------------|-----------------------|-----------------------|-----------------------|-----------------------|-----------------------|
| Think clearly                | <input type="radio"/> |
| Sleep well                   | <input type="radio"/> |
| Breathe easily               | <input type="radio"/> |
| Walk, climb stairs, exercise | <input type="radio"/> |
| Accomplish daily activities  | <input type="radio"/> |
| Work outside the home        | <input type="radio"/> |
| Work inside the home         | <input type="radio"/> |
| Interact with others         | <input type="radio"/> |
| Live your personal life      | <input type="radio"/> |

Compared to yesterday, I feel that my cold is...

| Very much better      | Somewhat better       | A little better       | The same              | A little worse        | Somewhat worse        | Very much worse       |
|-----------------------|-----------------------|-----------------------|-----------------------|-----------------------|-----------------------|-----------------------|
| <input type="radio"/> |







## VISIT 4

## Day 21

Name: \_\_\_\_\_  
 Age: \_\_\_\_\_ Sex: ☐ male ☐ female  
 Handedness: ☐ L ☐ R  
 Years of education: \_\_\_\_\_  
 Occupation: \_\_\_\_\_

**d2 Test of Attention**  
 Rolf Brickenkamp & Eric A. Zillmer

Examiner: \_\_\_\_\_ Date: \_\_\_\_\_

Example:  $\frac{d}{d}$   $\frac{d}{d}$   $\frac{d}{d}$

Practice line:  $\frac{d}{1}$   $\frac{p}{2}$   $\frac{d}{3}$   $\frac{d}{4}$   $\frac{d}{5}$   $\frac{d}{6}$   $\frac{p}{7}$   $\frac{d}{8}$   $\frac{d}{9}$   $\frac{p}{10}$   $\frac{d}{11}$   $\frac{d}{12}$   $\frac{d}{13}$   $\frac{d}{14}$   $\frac{p}{15}$   $\frac{d}{16}$   $\frac{d}{17}$   $\frac{d}{18}$   $\frac{p}{19}$   $\frac{d}{20}$   $\frac{d}{21}$   $\frac{d}{22}$

|                                      | Raw Score | Percentage | Percentile Rank | Standard Score |
|--------------------------------------|-----------|------------|-----------------|----------------|
| TN (total number)                    |           |            |                 |                |
| Omissions: E1                        |           |            |                 |                |
| Commissions: E2                      |           |            |                 |                |
| E (errors)                           |           |            |                 |                |
| TN-E (total errors)                  |           |            |                 |                |
| CP (concentration performance)       |           |            |                 |                |
| FR (fluctuation rate)                |           |            |                 |                |
| S-Syndrome: <input type="checkbox"/> |           |            |                 |                |

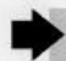

|    | TN | E <sub>1</sub> | E <sub>2</sub> | CP |
|----|----|----------------|----------------|----|
| 1  |    |                |                |    |
| 2  |    |                |                |    |
| 3  |    |                |                |    |
| 4  |    |                |                |    |
| 5  |    |                |                |    |
| 6  |    |                |                |    |
| 7  |    |                |                |    |
| 8  |    |                |                |    |
| 9  |    |                |                |    |
| 10 |    |                |                |    |
| 11 |    |                |                |    |
| 12 |    |                |                |    |
| 13 |    |                |                |    |
| 14 |    |                |                |    |

Time of completed \_\_\_\_\_ h \_\_\_\_\_ min

VISIT 4

Subject Initials

|  |  |  |
|--|--|--|
|  |  |  |
|--|--|--|

Subject ID

|  |  |  |  |  |
|--|--|--|--|--|
|  |  |  |  |  |
|--|--|--|--|--|

Date:

|  |  |
|--|--|
|  |  |
|--|--|

Month

|  |  |
|--|--|
|  |  |
|--|--|

Day

|  |  |
|--|--|
|  |  |
|--|--|

Year

Subject Off Study

Date subject went Off Study:

|  |  |
|--|--|
|  |  |
|--|--|

Month

|  |  |
|--|--|
|  |  |
|--|--|

Day

|  |  |
|--|--|
|  |  |
|--|--|

Year

Last visit completed

**INDICATE OFF STUDY REASON: (select only one)**

☐<sup>1</sup> Study Activities Completed

*If the subject was withdrawn prior to completing the study (i.e. early withdrawal), select one of the following:*

☐<sup>2</sup> Subject withdrawn – by Subject PRIOR to enrollment\*\*

☐<sup>3</sup> Subject withdrawn – by Subject AFTER enrollment\*\*

☐<sup>4</sup> Subject withdrawn – by PI PRIOR to enrollment\*\*

☐<sup>5</sup> Subject withdrawn – by PI AFTER enrollment\*\*

☐<sup>6</sup> Death

☐<sup>7</sup> Other\*\*

If the subject was withdrawn, indicate specific reason(s): *(select all that apply and enter as text into the Subject Console > Follow-up > Subject Off Study Update > Explain field)*

☐<sup>8</sup> Subject lost to follow-up

☐<sup>9</sup> Subject refused follow-up

☐<sup>10</sup> Due to adverse events or complications

☐<sup>11</sup> Other\*\*

\*\*Additional explanation required:

*(enter into the Subject Console > Follow-up > Subject Off Study Update > Explain field)*

|  |
|--|
|  |
|  |
|  |

FORM COMPLETED BY: \_\_\_\_\_



## VISIT 4

### Summary of patient's study outcome measures records

**Table 6. Summary of patient's study outcome measures records**

|                                                          | Outcome assessment by* | Visit 1 Baseline | Visit 2 | Visit 3 | Visit 4 |
|----------------------------------------------------------|------------------------|------------------|---------|---------|---------|
| Nick Name                                                | ObsRO                  |                  |         |         |         |
| Treatment code                                           | ObsRO                  |                  |         |         |         |
| Gender (F/M)                                             | ObsRO                  |                  |         |         |         |
| Age                                                      | ObsRO                  |                  |         |         |         |
| Acute phase duration                                     | ClinRO                 |                  |         |         |         |
| Duration of decreased attention (d2-test)                | PerfO                  |                  |         |         |         |
| Wisconsin URS Survey URTI Score                          | ClinRO                 |                  |         |         |         |
| Wisconsin URS Survey QOL Score                           | ClinRO                 |                  |         |         |         |
| Wisconsin URS Survey Total Score                         | ClinRO                 |                  |         |         |         |
| Duration and severity of fatigue                         | PRO                    |                  |         |         |         |
| Duration and severity of headache                        | PRO                    |                  |         |         |         |
| Duration of loss of smell                                | PRO                    |                  |         |         |         |
| Duration of loss of taste                                | PRO                    |                  |         |         |         |
| Duration and severity of rhinorrhea                      | PRO                    |                  |         |         |         |
| Duration of nasal congestions                            | PRO                    |                  |         |         |         |
| Duration and severity of sore throat                     | PRO                    |                  |         |         |         |
| Duration of Fever                                        | PRO                    |                  |         |         |         |
| Duration and severity of cough                           | PRO                    |                  |         |         |         |
| Duration and severity pain in muscles, chest, and joints | PRO                    |                  |         |         |         |
| Duration of stay at home-hospital/sick listed            | PRO                    |                  |         |         |         |
| Physical activity                                        | PRO                    |                  |         |         |         |
| COVID-19 PCR test                                        | BM                     |                  |         |         |         |
| Blood serum cytokin IL-6 (pg/ml)                         | BM                     |                  |         |         |         |
| D-Dimer                                                  | BM                     |                  |         |         |         |
| C-reactive protein                                       | BM                     |                  |         |         |         |
| Creatinine                                               | BM                     |                  |         |         |         |

\* - COA, clinical outcome assessment; ClinRO, clinician-reported outcome; ObsRO, observer-reported outcome; PerfO, performance outcome; PRO, patient-reported outcome, BM – biomarker.

**Form Completed By:** \_\_\_\_\_ **Date:** \_\_\_\_\_

**Site PI Signature:** \_\_\_\_\_ **Date:** \_\_\_\_\_

Subject Initials




Subject ID#







Page



of



## Adverse Event Tracking Log

*Insert question to ask participant (e.g. Were there any adverse events? Y/N)*

| # | Date Reported | Adverse Event Description | Adverse Event Category** | Start Date | End Date | Ongoing (Y or N) | Outcome <sup>1</sup> | Severity/Grade <sup>2</sup> | Serious (Y or N) | Expected (Y or N) | AE Treatment <sup>3</sup> | Action Taken <sup>4</sup> | Attribution <sup>5</sup> | PI Initials | Date of PI Initials |
|---|---------------|---------------------------|--------------------------|------------|----------|------------------|----------------------|-----------------------------|------------------|-------------------|---------------------------|---------------------------|--------------------------|-------------|---------------------|
|   |               |                           |                          |            |          |                  |                      |                             |                  |                   |                           |                           |                          |             |                     |
|   |               |                           |                          |            |          |                  |                      |                             |                  |                   |                           |                           |                          |             |                     |
|   |               |                           |                          |            |          |                  |                      |                             |                  |                   |                           |                           |                          |             |                     |
|   |               |                           |                          |            |          |                  |                      |                             |                  |                   |                           |                           |                          |             |                     |
|   |               |                           |                          |            |          |                  |                      |                             |                  |                   |                           |                           |                          |             |                     |
|   |               |                           |                          |            |          |                  |                      |                             |                  |                   |                           |                           |                          |             |                     |

# - AE number. "1" indicates the first adverse event documented on the form, 2 = the second, etc. If the adverse event changes in severity, enter it as a separate adverse event row on the paper form using the same AE number as the one that ended.

Subject Initials




Subject ID







Page



of



### Outcome<sup>1</sup>

- 0 – Fatal
- 1 – Not recovered/not resolved
- 2 – Recovered w/sequelae
- 3 – Recovered w/o sequelae
- 4 – Recovering/Resolving

### Severity/Grade<sup>2</sup>

- 1 – Mild
- 2 – Moderate
- 3 – Severe

### AE Treatment<sup>3</sup>

- 0 – None
- 1 – Medication(s)
- 2 – Non-medication TX

### Action Taken<sup>4</sup> with Study Intervention

- 0 – None
- 1 – Interrupted
- 2 – Discontinued
- 3 – Dose reduced
- 4 – Dose increased

### Attribution/ Relatedness<sup>5</sup>

- 0 – Definite
- 1 – Probable
- 2 – Possible
- 3 – Unlikely
- 4 – Unrelated

## Drug Dispensation & Accountability Log

|               |                      | Dispensed to Subject           |                           |                |                               |                             | Returned by Subject           |                          |               |                              | Compliance                        |                                            |               |
|---------------|----------------------|--------------------------------|---------------------------|----------------|-------------------------------|-----------------------------|-------------------------------|--------------------------|---------------|------------------------------|-----------------------------------|--------------------------------------------|---------------|
| Lot Number(s) | Randomization Number | Number of Containers Dispensed | Number of Units Dispensed | Date Dispensed | Dispensed by (staff initials) | Expected Date of First Dose | Number of Containers Returned | Number of units returned | Date Returned | Verified by (staff initials) | Actual number of units used/taken | Estimated number of units to be used/taken | % compliance* |
|               |                      |                                |                           |                |                               |                             |                               |                          |               |                              |                                   |                                            |               |
|               |                      |                                |                           |                |                               |                             |                               |                          |               |                              |                                   |                                            |               |
|               |                      |                                |                           |                |                               |                             |                               |                          |               |                              |                                   |                                            |               |
|               |                      |                                |                           |                |                               |                             |                               |                          |               |                              |                                   |                                            |               |
|               |                      |                                |                           |                |                               |                             |                               |                          |               |                              |                                   |                                            |               |
|               |                      |                                |                           |                |                               |                             |                               |                          |               |                              |                                   |                                            |               |
|               |                      |                                |                           |                |                               |                             |                               |                          |               |                              |                                   |                                            |               |
|               |                      |                                |                           |                |                               |                             |                               |                          |               |                              |                                   |                                            |               |
|               |                      |                                |                           |                |                               |                             |                               |                          |               |                              |                                   |                                            |               |

\*Calculation of % Compliance = Actual taken / Estimated to be taken

Form Completed By: \_\_\_\_\_ Date: \_\_\_\_\_

Site PI Signature: \_\_\_\_\_ Date: \_\_\_\_\_

## PROTOCOL DEVIATION FORM

**Subject Random No:** \_ \_ \_ \_

**Subject Initials :** \_ \_ \_

### DEVIATION CODES

A – Consent Procedures  
B – Inclusion/Exclusion Criteria  
C – Concomitant Medication/Therapy  
D – Laboratory Assessments/Procedures

E – Study Procedures  
F – Serious Adverse Event Reporting /  
Unanticipated Adverse Device Effect

G – Randomization Procedures/Study Drug  
Dosing  
H – Visit Schedule/Interval

I – Efficacy Ratings  
J – Other

| SL No: | Date of Deviation occurred | Date of Deviation identified | Deviation Description | Dev. Type | Affects subject participation | EC reporting required |
|--------|----------------------------|------------------------------|-----------------------|-----------|-------------------------------|-----------------------|
|        | ___/___/___                | ___/___/___                  |                       |           | Yes    No                     | Yes    No             |
|        |                            |                              |                       |           |                               |                       |
|        |                            |                              |                       |           |                               |                       |
|        |                            |                              |                       |           |                               |                       |
|        |                            |                              |                       |           |                               |                       |
|        |                            |                              |                       |           |                               |                       |
|        |                            |                              |                       |           |                               |                       |
|        |                            |                              |                       |           |                               |                       |
|        |                            |                              |                       |           |                               |                       |

Data verified by :

Signature :

# **PROTOCOL VIOLATION FORM**

**Subject Random No:** \_ \_ \_ \_

**Subject Initials :** \_ \_ \_

## **VIOLATION CODES**

- A. Screening before taking ICF
- B. Improper Informed consent
- C. Missing ICF
- D. Improper Inclusion of subjects

- E. Breach of confidentiality
- F. Falsification of records
- G. Wrong treatment allocation
- H. Subject withdrawal criteria not followed

- I. Omission of evaluations / tests
- Improper use of concomitant medications

| SL No: | Date of Violation occurred | Date of Violation identified | Violation Description | Violation Type | Affects subject participation |    | EC reporting Done |    |
|--------|----------------------------|------------------------------|-----------------------|----------------|-------------------------------|----|-------------------|----|
|        |                            |                              |                       |                | Yes                           | No | Yes               | No |
|        | _ _ _ / _ _ _ _ / _ _ _    | _ _ _ / _ _ _ _ / _ _ _      |                       |                |                               |    |                   |    |
|        |                            |                              |                       |                |                               |    |                   |    |
|        |                            |                              |                       |                |                               |    |                   |    |
|        |                            |                              |                       |                |                               |    |                   |    |
|        |                            |                              |                       |                |                               |    |                   |    |
|        |                            |                              |                       |                |                               |    |                   |    |
|        |                            |                              |                       |                |                               |    |                   |    |
|        |                            |                              |                       |                |                               |    |                   |    |

Data verified by :

Signature:

| SAE                                                                                                                                                                                                                                                |                                                                 |                                                                         |       |
|----------------------------------------------------------------------------------------------------------------------------------------------------------------------------------------------------------------------------------------------------|-----------------------------------------------------------------|-------------------------------------------------------------------------|-------|
| Subject Screening No: _ _ _ _ _                                                                                                                                                                                                                    |                                                                 | Subject Initials : _ _ _                                                |       |
| SAE report:#<br><br>Type of report:    Initial                  Follow up<br><br>Final                                                                                                                                                             | Date of Submission to Sponsor:<br><br>Date of Submission to EC: |                                                                         |       |
| <b>Reason for Reporting</b>                                                                                                                                                                                                                        | <b>Yes</b>                                                      | <b>No</b>                                                               |       |
| Death                                                                                                                                                                                                                                              |                                                                 |                                                                         | Date: |
| Life-threatening event?                                                                                                                                                                                                                            |                                                                 |                                                                         |       |
| In-patient hospitalisation or prolongation of existing hospitalisation?                                                                                                                                                                            |                                                                 |                                                                         |       |
| Persistent or significant disability/ incapacity?                                                                                                                                                                                                  |                                                                 |                                                                         |       |
| Other pertinent medical reason for reporting?                                                                                                                                                                                                      |                                                                 |                                                                         |       |
| If other, please specify:                                                                                                                                                                                                                          |                                                                 |                                                                         |       |
| Place of Occurrence:                                                                                                                                                                                                                               |                                                                 | Date of Onset :<br><br>Time (if known) :                                |       |
| Brief Diagnosis:                                                                                                                                                                                                                                   |                                                                 |                                                                         |       |
| Causality Assessment: <input type="checkbox"/> Unrelated to treatment <input type="checkbox"/> Unlikely related <input type="checkbox"/> Possibly related<br><input type="checkbox"/> Probably related <input type="checkbox"/> Definitely related |                                                                 |                                                                         |       |
| Action taken with IP : <input type="checkbox"/> None <input type="checkbox"/> Dose reduced <input type="checkbox"/> Discontinued                                                                                                                   |                                                                 |                                                                         |       |
| Treatment Action : <input type="checkbox"/> Treated with medication <input type="checkbox"/> Surgical Intervention <input type="checkbox"/> other<br><br>If other describe :                                                                       |                                                                 |                                                                         |       |
| Withdrawn from the study ? <input type="checkbox"/> Yes <input type="checkbox"/> No                                                                                                                                                                |                                                                 | Expected SAE : <input type="checkbox"/> Yes <input type="checkbox"/> No |       |

|                                                                                                                                                                                                                                                                                                                                           |                                                     |
|-------------------------------------------------------------------------------------------------------------------------------------------------------------------------------------------------------------------------------------------------------------------------------------------------------------------------------------------|-----------------------------------------------------|
| <p>Outcomes: <input type="checkbox"/> Resolved <input type="checkbox"/> Recovered with minor sequelae</p> <p><input type="checkbox"/> Recovered with major sequelae <input type="checkbox"/> Ongoing / Continuing</p> <p><input type="checkbox"/> Condition worsening <input type="checkbox"/> Death <input type="checkbox"/> Unknown</p> | <p>Date of resolution</p> <p>____ / ____ / ____</p> |
| <p>Name of the PI :</p> <p>Site Name:</p> <p>Address :</p> <p>Contacts : Email :</p> <p>Tel : :</p> <p>Signature : _____ Date: _____</p>                                                                                                                                                                                                  |                                                     |

**Form Completed By:** \_\_\_\_\_ **Date:** \_\_\_\_\_

**Site PI Signature:** \_\_\_\_\_ **Date:** \_\_\_\_\_
